## RESEARCH ARTICLE

# Interleukin-27-induced HIV-resistant dendritic cells suppress reverse transcription following virus entry in an SPTBN1, autophagy, and YB-1 independent manner

Tomozumi Imamichi<sup>1</sup>\*, Qian Chen<sup>1</sup>, Bharatwaj Sowrirajan<sup>1</sup>, Jun Yang<sup>1</sup>, Sylvain Laverdure<sup>1</sup>, Mayra Marquez<sup>1</sup>, Anthony R. Mele<sup>1</sup>, Catherine Watkins<sup>2</sup>, Joseph W. Adelsberger<sup>2</sup>, Jeanette Higgins<sup>2</sup>, Hongyan Sui<sup>1</sup>

**1** Laboratory of Human Retrovirology and Immunoinformatics, Frederick National Laboratory for Cancer Research, Frederick, Maryland, United States of America, **2** AIDS monitoring Laboratory, Frederick National Laboratory for Cancer Research, Frederick, Maryland, United States of America

\* These authors contributed equally to this work.

\* [timamichi@mail.nih.gov](mailto:timamichi@mail.nih.gov)

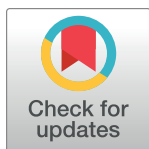

## OPEN ACCESS

**Citation:** Imamichi T, Chen Q, Sowrirajan B, Yang J, Laverdure S, Marquez M, et al. (2023) Interleukin-27-induced HIV-resistant dendritic cells suppress reverse transcription following virus entry in an SPTBN1, autophagy, and YB-1 independent manner. PLoS ONE 18(11): e0287829. <https://doi.org/10.1371/journal.pone.0287829>

**Editor:** Arunava Roy, University of South Florida, UNITED STATES

**Received:** June 19, 2023

**Accepted:** October 3, 2023

**Published:** November 1, 2023

**Peer Review History:** PLOS recognizes the benefits of transparency in the peer review process; therefore, we enable the publication of all of the content of peer review and author responses alongside final, published articles. The editorial history of this article is available here: <https://doi.org/10.1371/journal.pone.0287829>

**Copyright:** © 2023 Imamichi et al. This is an open access article distributed under the terms of the [Creative Commons Attribution License](https://creativecommons.org/licenses/by/4.0/), which permits unrestricted use, distribution, and reproduction in any medium, provided the original author and source are credited.

**Data Availability Statement:** All relevant data are within the paper and its [Supporting Information](#) files.

## Abstract

Interleukin (IL)-27, a member of the IL-12 family of cytokines, induces human immunodeficiency virus (HIV)-resistant monocyte-derived macrophages and T cells. This resistance is mediated via the downregulation of spectrin beta, non-erythrocytic 1 (SPTBN1), induction of autophagy, or suppression of the acetylation of Y-box binding protein-1 (YB-1); however, the role of IL-27 administration during the induction of immature monocyte-derived dendritic cells (iDC) is poorly investigated. In the current study, we investigated the function of IL-27-induced iDC (27DC) on HIV infection. 27DC inhibited HIV infection by  $95 \pm 3\%$  without significant changes in the expression of CD4, CCR5, and SPTBN1 expression, autophagy induction and acetylation of YB-1 compared to iDC. An HIV proviral DNA copy number assay displayed that 27DC suppressed reverse transcriptase (RT) reaction without influencing the virus entry. A DNA microarray analysis was performed to identify the differentially expressed genes between 27DC and iDC. Compared to iDC, 51 genes were differentially expressed in 27DC, with more than 3-fold changes in four independent donors. Cross-reference analysis with the reported 2,214 HIV regulatory host genes identified nine genes as potential inter-ests: Ankyrin repeat domain 22, Guanylate binding protein (GBP)-1, -2, -4, -5, Stabilin 1, Serpin family G member 1 (SERPING1), Interferon alpha inducible protein 6, and Interferon-induced protein with tetratricopeptide repeats 3. A knock-down study using si-RNA failed to determine a key factor associated with the anti-HIV activity due to the induction of robust amounts of off-target effects. Overexpression of each protein in cells had no impact on HIV infection. Thus, we could not define the mechanism of the anti-HIV effect in 27DC. However, our findings indicated that IL-27 differentiates monocytes into HIV-resistant DC, and the inhibitory mechanism differs from IL-27-induced HIV-resistant macrophages and T cells.

**Funding:** This project has been funded in whole or in part with federal funds from the National Cancer Institute, National Institutes of Health, under Contract No. HHSN261200800001E. This research was supported [in part] by the National Institute of Allergy and Infectious Disease awarded to T.I.

**Competing interests:** The authors have declared that no competing interests exist.

## Introduction

Dendritic cells (DCs) regulate the immune response by initiating and shaping adaptive immune responses against pathogens and cancer. In the periphery, immature DCs (iDC) surveil their environment for foreign pathogens [1, 2]. The uptake of pathogens by iDC in peripheral tissues causes the DCs to migrate to the lymph nodes. During this process, iDC upregulate activation markers and degrade foreign pathogens into peptide antigens [3]. Mature DCs (mDCs) present these peptide antigens on their human leukocyte antigen (HLA) molecules to activate and clonally expand T cells and clear the pathogen [4, 5]. However, certain pathogens, such as human immunodeficiency virus type 1 (HIV-1), can hijack these pathways in DCs to mediate virus replication and dissemination throughout the body [6].

HIV-1 infects CD4-expressing cells utilizing chemokine receptors (CXCR4 and CCR5). The initiation of infection is caused by the binding of HIV envelope protein on the virus particles through CD4 [7]. The interaction promotes a conformational change in the envelope protein and induces the second interaction with CXCR4 or CCR5. This secondary interaction triggers the fusion of the virus and host cell membranes, and HIV core protein enters the target host cells. Based on the receptor usage, HIV is classified into two groups, X4 and R5 HIV: X4 and R5 HIV use CXCR4 and CCR5, respectively. This infection is considered a *cis*-infection or a productive infection [8–10].

HIV-1 infects DCs via two distinct pathways, the *cis*- and *trans*-infection [10]. *Trans*-infection requires the endocytosis of the entire HIV-1 virion into endosomal vesicles, which are subsequently released into the immunological synapse between DCs and T cells via exocytosis [11–13]. The *cis*-infection of DCs by HIV-1 results in productive infection, leading to the generation of new virions [8]. The productive infection of DCs requires HIV-1 to exploit numerous host cell factors for replication and dissemination. In turn, host cells may express cellular restriction factors that inhibit viral replication. Many of these factors are stimulated upon exposure to certain cytokines, such as type I interferons (IFNs) [14–17]. Our previous studies identified interleukin (IL)-27 as a novel inhibitory cytokine of HIV-1 produced by cervical cancer vaccine-treated macrophages [18], which induces multiple IFN-stimulated genes, including host factors, via an IFN-independent mechanism [19, 20].

IL-27, a member of the IL-12 cytokine family (IL-12, IL-23, IL-35, and IL-39) [21], is a heterodimer composed of the IL-27 p28 and Epstein-Barr virus-induced gene 3 (EBI3) subunit [22, 23]. It plays crucial roles in both innate and adaptive immune responses. It binds to the IL-27 receptor (IL27R), which is a heterodimer made of IL27R alpha chain (also known as WSX-1) and the glycoprotein 130 (gp130) [21, 24]. Stimulation of the IL27R by IL-27 triggers downstream signaling through activation of Janus Kinase (JAK) and Signal Transducer and Activator of Transcription (STAT) pathways [25, 26]. The activated STAT-1 and STAT-3 induce many downstream host-cell gene activation including microRNAs and long noncoding RNAs [19, 27–30]. Previous studies have demonstrated that IL-27 has both pro- and anti-inflammatory functions [26]. Naïve T-cells proliferate and differentiate into T helper 1 (Th1) cells in the presence of IL-27 [31]. In contrast, IL-27 activates regulatory T cells and inhibits the generation of Th17 and T follicular cells. Additionally, it stimulates the production of the anti-inflammatory cytokine IL-10 [32]. IL-27-mediated HIV-1 inhibition occurs via the induction of IFN-stimulatory genes (ISGs) in a type I IFN-independent manner [9, 19]. Furthermore, IL-27 regulates the functions of epidermal cells and keratinocytes [33–35], the central nervous system [36, 37], tumor cells [38, 39] and mucosal innate immune responses [40, 41]. Therefore, IL-27 is considered a pleiotropic cytokine. IL-27-mediated function has been reported to be IFN-induction-dependent and independent [42, 43], cell type-dependent manner [43].

We previously assessed the anti-viral activity of IL-27 in different cell types, including CD4(+) T cells, terminally differentiated primary monocyte-derived macrophages (MDMs) and iDC [9, 18, 19, 44]. CD4(+) T cells, MDMs or iDC were infected with HIV and then cultured in the presence of IL-27. HIV replication was suppressed in a dose-dependent manner [9, 18, 44].

To further elucidate the role of IL-27 on HIV infection in T cells, the cells were treated with IL-27 before infection. The IL-27-treated T cells were infected with HIV and cultured without exogenous IL-27 [45]. The treated T cells demonstrated HIV resistance by a change in the isoelectric point (pI) of Y box B 1 protein (YB-1): pIs of YB in iDC and 27DC around 4.4~5.0 and 4.5~9.5, respectively; subsequently, RT reaction was inhibited. Multiple posttranslational modifications, including phosphorylation, acetylation, and methylation, are involved in YB-1 function [46, 47]. A mass spectrometry analysis of YB-1 demonstrated that the pI change was caused by suppression of acetylation at lysin 118 residue of YB-1 without significant changes in the gene expression compared to untreated CD4 T cells [45]. To define a role of IL-27 during monocyte differentiation into macrophages, monocytes were stimulated by differentiation inducing factors (macrophage colony-stimulating factor (M-CSF) or human AB serum) in the presence of IL-27. We found that IL-27-induced MDMs resist infection with HIV-1 [27, 44], and demonstrated that the resistance was associated with the down-regulation of spectrin beta, non-erythrocytic 1 (SPTBN1) or the induction of autophagy [44].

IL-27-induced dendritic cells (27DC) are reported to improve antigen processing and stimulate T cells [48]. However, the anti-HIV effect in the cells remains unclear. Therefore, in the current study, we examined the function of the anti-HIV effect in 27DC, and the molecular mechanism of anti-HIV was investigated.

## Material and methods

### Ethics statement

Approval for this study, including all sample materials and protocols, was granted by the National Institute of Allergy and Infectious Diseases (NIAID) Institutional Review Board, and participants were provided the informed written consent prior to blood being drawn. All experimental procedures in these studies were approved by the National Cancer Institute at Frederick and Frederick National Laboratory for Cancer Research (the protocol code number: 16–19, approval date: 6 January 2017). All samples and data were collected from May 2017 to March 2023. During this time, total 53 healthy donors were enrolled, and all data were access for research purposes.

### Cells and reagents

Peripheral blood mononuclear cells (PBMCs) were isolated from healthy donors' apheresis packs (NIH blood bank) using a lymphocyte separation medium (ICN Biomedical, Aurora, OH, USA), CD14+ monocytes were isolated from PBMC utilizing CD14 microbeads (Miltenyi Biotec, Auburn, CA, USA) as previously described [18]. The purity of the cell types was at least 90%, based on the flow cytometric analysis. Cell viability was determined using the trypan blue (Thermo Fisher Scientific, Waltham, MA, USA). The iDC were generated by culturing CD14+ monocytes in RPMI 1640 (Thermo Fisher Scientific) supplemented with 10% (v/v) fetal bovine serum (FBS) (HyClone/Cytiva, Marlborough, MA, USA), 25 mM HEPES (Quality Biological, Gaithersburg, MD, USA), and 5 µg/ml gentamycin (Thermo Fisher) with 50 ng/ml of IL-4 (R&D systems, Minneapolis, MN, USA) and 50 ng/ml of GM-CSF (R&D Systems) (G4 Media) [9]. To create 27DC, recombinant IL-27 (R&D systems) was added to the G4 media during dendritic cell differentiation at a concentration of 100 ng/ml. Half of the culture media

was changed on day 4 with fresh G4 media with or without IL-27 [9]. HEK293T cells were obtained from ATCC (Manassas, VA, USA) and maintained in complete D-MEM (Thermo Fisher Scientific) supplemented with 10 mM HEPES, 10% FBS, 50 µg/mL gentamicin (D10 medium) as previously described [49]. Recombinant SERPING1 was purchased from R&D systems.

## Viruses

Recombinant R5 HIV (HIV<sub>AD8</sub>) and X4 HIV (HIV<sub>NL4.3</sub>) were prepared by transfecting plasmid encoding full-length of each HIV gene (pAD8 [50] and pNL4.3 [51]) into HEK293T cells, respectively. A pseudotyped HIV-1 virus (HIV<sub>Luc</sub>-VSVG) expressing the luciferase gene (HIV<sub>Luc</sub>) was created by transfection of pHIV-1<sub>NL4/3</sub>-Luciferase-ΔEnv and p-VSV-G into HEK293T cells in 10 cm dishes [44, 52, 53]. The HIV-1<sub>NL4/3</sub>-Env<sub>AD.8</sub>-ΔVpr with Vpr-BLAM was produced by transfection of pHIV-1<sub>NL4/3</sub>-Env<sub>AD.8</sub>-ΔVpr and pVpr-BLAM [54, 55] (a kind gift from Dr. Warner Greene) into HEK293T cells. All plasmid DNA transfections were conducted using TransIT-293 (Mirus, Houston, TX, USA) and Opti-MEM I medium (Thermo Fisher Scientific) following a method previously reported [44]. Supernatants were then ultracentrifuged at 100,000 x g for 2 hours at 4°C onto a 20% sucrose in 10 mM HEPES-150 mM NaCl cushion [56]. Pelleted particles were resuspended in D10 medium and the concentration of HIV p24 was quantitated by using an HIV-1 p24 ELISA Kit (Perkin Elmer, Boston, MA, USA) [49, 56]. Infection titer (50% tissue culture infectious dose, TCID<sub>50</sub>) of each virus was determined by an endpoint assay [57].

## HIV-1 replication assay

HIV-1<sub>AD8</sub> (R5 tropic) and HIV-1<sub>NL4.3</sub> (X4 Tropic) viruses were utilized to infect iDC and 27DC. Cells (5x10<sup>6</sup>) were infected at 5000 TCID<sub>50</sub> / 1x10<sup>6</sup> cells at 37°C for 2 hours on a cell-rotator (Milenyi Biotec). After infection, cells were washed 3 times with RPMI-1640 supplemented with 10% FBS (RP10) and incubated at 0.5x10<sup>6</sup> cells/ml in 96 well plates in quadruplicate in G4 media. Cells were cultured for 14 days with one-half of the media being replaced every 3–4 days with fresh G4 media without IL-27. HIV-1 p24 released into the supernatants was measured using the HIV-1 p24 ELISA Kit.

## Pseudotyped HIV infection

DCs (1x10<sup>6</sup> cells) were infected with HIV<sub>Luc</sub>-VSVG at a concentration of 500 ng p24/mL in RP10 for 2 hours at 37°C on the cell-rotator. After infection, cells were washed with RP10 followed by being cultured for 48 hours at 0.5x10<sup>6</sup> cells/mL in 96 well plates in triplicate or quadruplicate in G4 media. Luciferase expression in cells was measured by lysing the cells in Passive Lysis Buffer (Promega, Madison, WI, USA) and incubating the lysis supernatant with the Luciferase Assay System (Promega). Luciferase activity was read on an Enspire Multimode Plate Reader (Perkin Elmer). Cell lysates were also subjected to a BCA assay for protein quantification (Thermo Fisher Scientific).

## HIV-1 binding assay

DCs were incubated with HIV-1<sub>AD8</sub> (5000 TCID<sub>50</sub> per 1x10<sup>6</sup> cells) at 4°C for 90 minutes to allow binding [58], and then washed to remove unbound virus at 4°C with cold PBS. Total RNA was extracted and reverse transcription of viral RNA was performed as previously described [59]. The levels of virus binding were estimated with copy numbers of viral RNA measured with quantitative RT-PCR [44].

### Quantitative RT-PCR (qRT-PCR)

qRT-PCR was performed as previously reported [60]. Total cellular RNAs from iDC and 27DC were isolated as described above. 1 µg of RNA was used to make cDNA using the TaqMan Reverse Transcription Reagents (Thermo Fisher Scientific). Samples were run on Applied Biosystems GeneAmp PCR system 9700 at 25°C for 10 minutes, 48°C for 30 minutes, and finally for 95°C for 5 minutes. DNA products were used for real time qRT-PCR reaction using the TaqMan 2X Universal PCR Master Mix (Thermo Fisher Scientific) on an iQ5 RT-PCR detection system (BioRad, Hercules, CA, USA) [61].

### HIV-1 fusion assay

HIV-1 fusion to iDC and 27DC was measured following the previously described protocol [55]. Briefly,  $3 \times 10^6$  iDC or 27DC were infected with HIV-1<sub>NL4/3-Env<sub>AD8</sub>-ΔVpr + Vpr-BLAM</sub> at a concentration of 500 ng p24/ml. Infection was allowed to proceed for 2 hours at 37°C. To suppress the virus binding TAK779 (Bio-Techne Corp., Minneapolis, MN, USA) was supplemented during the infection. Following infection, cells were washed 3 times, and stained with the fluorescent dye CCF2 (Thermo Fisher Scientific). After staining, the cells were incubated in CO<sub>2</sub> independent media with 10% FBS, 25 mM HEPES, 5 µg/ml of Gentamycin, and 2.5 mM probenecid. Incubation occurred for 16 hours at room temperature in the dark followed by analysis by flow cytometric analysis.

### HIV-1 early and late reverse transcriptase (RT) products

Quantitative analysis of HIV-1 early and late RT products was performed as previously described [62]. Briefly,  $3 \times 10^6$  iDC or 27DC were infected with HIV-1<sub>AD.8</sub> at 37°C. Infected cells were incubated for 24 hours prior to genomic DNA extraction using the QIAmp DNA Mini Kit (Qiagen). HIV-1 early and late RT products copy numbers were quantitated by real time PCR as described above. HIV-1 late RT products were measured using a primer probe against HIV-1 Gag [63]. HIV-1 early products were measured using a primer probe against the RU5 region of the viral cDNA [64]. Copy numbers for both were normalized to RNase P.

### Fluorescence-activated cell sorting (FACS) analysis

Total  $1 \times 10^6$  cells of iDC or 27DC were washed three times with ice-cold Dulbecco's PBS (Thermo Fisher Scientific) in the presence of BSA, and then blocked using Fc Receptor Blocker (Innovex Biosciences, Richmond, CA, USA) for 30 minutes at room temperature in the dark. Cells were washed twice in 2% BSA (MilliporeSigma, St. Louis, MO, USA) with 0.5% NaN<sub>3</sub> (MilliporeSigma) in Dulbecco's PBS (DPBS-BSA-NaN<sub>3</sub>). Cells were then stained, including paired isotype controls, for 15 minutes at room temperature in the dark. The following antibodies, and their respective fluorochrome, were used: CD4 (Fluorochrome BV421; BioLegend, San Diego, CA, USA; Ca# 317434) and isotype control (Fluorochrome BV421; BioLegend; Ca# 400158), CCR5 (Fluorochrome APC-Cy7; BD Biosciences, Franklin Lakes, NJ, USA; Ca# 557755) and isotype control (Fluorochrome APC-Cy7; BioLegend; Ca# 400128), CXCR4 (Fluorochrome PE; BioLegend; Ca# 306506) and isotype control (Fluorochrome PE; BioLegend; Ca# 400114). The cells were washed twice in DPBS-BSA-NaN<sub>3</sub> and then run immediately on an LSR Fortessa flow cytometer (BD Biosciences). The results were analyzed using FCS Express version 7 (DeNovo Software, Pasadena, CA, USA).



## Western blotting

Cells were lysed in Radioimmunoprecipitation assay (RIPA) buffer (Boston BioProducts, Milford, MA, USA) supplemented with 5 mM EDTA (Quality Biologicals), 1X protease inhibitor cocktail (MilliporeSigma) and 1X phosphatase inhibitor (Thermo Fisher Scientific) for 15 minutes on ice. Then, cell debris were removed by centrifugation at 14,000 rpm for 10 minutes at 4°C. Protein concentration was quantified by using a BCA Assay kit (Thermo Fisher Scientific). A total of 20 µg protein was loaded per sample onto a lane of NuPAGE 4–12% Bis-Tris Gel (Thermo Fisher Scientific) in MOPS buffer (Thermo Fisher Scientific) (for detection of ANKRD22 or SERPING1) or 3–8% TA gels (Thermo Fisher Scientific) in TA buffer (Thermo Fisher Scientific) (for detection of SPTBN1 or STAB1). Gel was subsequently transferred to nitrocellulose membranes and blocked for 1 hour in 5% milk solution in PBS (Quality Biologicals) with 0.1% Tween 20 (MilliporeSigma) (PBS-T). Membranes were then incubated overnight with appropriate antibody at 4°C with gentle agitation. Antibodies against SPTBN1 (Cat# ab72239), ANKRD22 (Cat# ab11638), SERPING1 (Cat# ab134915), CCL3 (Cat# ab229900), CCL4 (Cat# ab40857), CCL5 (Cat# ab307712), and glyceraldehyde-3-phosphate dehydrogenase (GAPDH) (Cat# ab 9485) were obtained from Abcam (Waltham, MA, USA). All antibodies from Abcam were diluted as 1:1000 in PBS-T-5% dry milk. Anti-Stabin-1 (Cat# AB6021) and anti-β-actin (Cat# A5316) were obtained from MilliporeSigma. All antibodies were used according to manufacturer's protocol; anti-Stab1 and anti-β-actin antibodies were diluted as 1:1000 and 1:5000, respectively. Following primary antibody incubation, membranes were washed 3x in PBS-T and then incubated with 1:5000-fold diluted appropriate secondary antibody conjugated with horseradish peroxidase (GE Healthcare, Chicago, IL, USA) in PBS-T-5% dry-milk. Chemiluminescence was accomplished using Amersham ECL Prime Western Blotting Detection Reagent (GE Healthcare) and signal was detected on the Azure 300 (Azure Biosystem, Dublin, CA, USA). The intensity of the band was analyzed by NIH Image J (<http://rsbweb.nih.gov/ij/>) [60].

## Autophagy assay

Endogenous autophagy induction in iDC and 27DC was compared by autophagosome staining as previously described [27, 30]. Briefly, iDC and 27DC were seeded in 96-well plate at  $150 \times 10^3$  cells/well and then autophagosomes were stained using the Cyto-ID® reagent (Enzo Life Sciences, Farmingdale, NY, USA) and Hoechst 33342 as a counterstain. Autophagosome ( $2 \times 3$  composite) images were taken on a Zeiss Axio Observer.Z1 motorized microscope (Carl Zeiss Microscopy, White Plains, NY, USA) at a 10× magnification. Quantification analysis of each image was performed using the Fiji Image J software (National Institutes of Health, Bethesda, MD, USA). For each channel, a background threshold was set up, to create 8-bit masks. For the green channel, the total stained area was retrieved as a measure of autophagosome staining, while a particle counts following watershed processing of the blue channel gave the corresponding cell number, then resulting values display a total cell for each experimental condition [27].

## Two-dimensional western blotting

To detect the post-translational modification of YB-1 protein, two-dimensional (2D) WB was conducted as previously described [45]. Whole cell lysate of iDC and 27DC were prepared using RIPA (Boston BioProducts, Milford, MA, USA) supplemented with 5 mM EDTA (Quality Biological), 1X protease inhibitors (MilliporeSigma), and 1X phosphatase inhibitors cocktail (Thermo Fisher Scientific) at  $10 \times 10^6$  cells/mL for 15 minutes on ice. The cell lysate was centrifuged at 15,000 x g for 10 minutes at 4°C to remove cell debris. Protein concentration

was determined using a BCA Assay. The total cellular protein (100 µg) was subjected for 2D-WB analysis [45].

### DNA microarray analysis

DNA microarray assay was performed using the Affymetrix GeneChips (Affymetrix, Thermo Fisher Scientific). The Affymetrix Human Gene 2.0 ST Array was used. Total cellular RNA was extracted from iDC and 27DC using RNA easy kit (Qiagen, Germantown, MD, USA) and quantitated using the 2100 Bioanalyzer (Agilent, Santa Clara, CA, USA) and Qubit Fluorometric Quantitation (Thermo Fisher Scientific). Terminal labeling and hybridization, array wash, stain, and scan were processed according to the Affymetrix recommended standard protocol [9]. Intensity data were processed and summarized to gene level with Partek Genome Suite (Partek, Chesterfield, MO, USA). Differentially expressed gene candidates were selected for verification with an absolute fold change difference >3.0 with significant differences determined by two-way ANOVA. Functional enrichment analysis was performed using Metascape (the database for annotation, visualization, and integrated discovery) [65].

### ELISA

Amounts of the secreted SPERPING1, CCL3, CCL4 and RANTES in culture supernatants was quantified using Human Serpin G1/C1 Inhibitor Quantikine ELISA Kit, Human CCL3/MIP-1 alpha DuoSet ELISA kit, Human CCL4/MIP-1 beta Quantikine ELISA Kit, and Human CCL5/RANTES Quantikine ELISA Kit, respectively following the manufacturer's protocol. All kits were obtained from R&D systems. Detection limits for quantification of SERPING1, CCL3, CCL4, and RANTES are 313 pg/ml, 31.2 pg/ml, 15.6 pg/m, 31.2 pg/ml, respectively.

### siRNA transfection

To define the role of ANKRD22 expression in 27DC, we first attempted to knock down the gene using siRNA transfection into 27DC. As a pilot experiment, si-ANKRD22 and a control none-targeting siRNA (si-Ctrl) were delivered using several different transfection lipids: Lipofectamine RNAiMAX (Thermo Fisher), Lipofectamin2000 (Thermo Fisher), TransIT-siQUEST (Mirus), INTERFERin (Polypus), or HiPerFect T (Qiagen), and 4D electroporation system with the P3 reagent (Lonza). Even though we used different sequences of si-ANKRD22 (Thermo Fisher Scientific, Horizon, or OriGene), none of si-ANKRD22 consistently suppressed ANKRD22 expression in 27DC and cytotoxic effect was observed. Therefore, we performed siRNA transfection into monocytes before differentiation using a protocol described by Troegeler et al. [66]. Briefly, 200 nmol of siRNA (Thermo Fisher Scientific) in RNase-free water was diluted in 485 µL of Opti-MEM (Thermo Fisher Scientific) and 15 µL of HiPerFect (Qiagen) transfection reagent was added. Transfection mix was gently mixed by pipetting and then incubated at room temperature for 20 minutes. The lipid-siRNA complexes were added to  $1 \times 10^7$  monocytes in 1.5 mL of Macrophage-serum free media (Thermo Fisher Scientific) and incubated for 4 hours at 37°C with a gently rotation. After transfection, the supernatants were removed and then the transfected cells were cultured in RP10 containing 50 ng/ml of GM-CSF at  $0.5 \times 10^6$  cells/ml for 16 hr at 37°C to rest. The half of culture medium was replaced with fresh RP10 containing 50 ng /ml GM-CSF and 100 ng/ml IL-4 with or without 200 ng/ml IL-27. The cells were cultured for seven days with changing medium as described above to induce iDC or 27DC.

## Over expression of ANKRD22

To define the impact of ANKRD22 protein on HIV Infection. HEK293T cells were reverse transfected with plasmid encoding each gene. Briefly, 10  $\mu$ g of pCMV6 encoding ANKRD22 gene (OriGene, Rockville, MD, USA) was incubated with 30  $\mu$ L of TransIT-293 in 600  $\mu$ L of OPT-MEM for 30 minutes at RT, and then cultured with  $6 \times 10^6$  293T cells in 10 mL of D10 media in a 100 mm tissue culture dish (Becton Dickinson, Franklin Lakes, NJ, USA) for 2 days. As a control, empty pCMV6 vector (OriGene) was transfected into the cells. The transfected cells were collected and then expression of ANKRD22 was confirmed by WB. HIV infection was conducted using  $2 \times 10^6$  cells in 500  $\mu$ L of D10 media. The cells were infected with 100 ng p24 /mL of HIVLuc-VSVG for 2 hours at 37°C on the rotator. After infection, the cells were washed with D10 and then cultured at  $50 \times 10^3$  cells/ 96 well plate for 2-days in octuplicate in 200  $\mu$ L D10 media. The cells were lysed using Bright-Glo (Promega) and Luciferase expression was measured using the Enspire Multimode Plate Reader.

## Statistical analysis

Statistical analyses were performed using GraphPad Prism 9 software (San Diego, CA, USA). Error bars indicate standard deviation (SD) or standard error mean (SEM). The Student's unpaired t-test or one way ANOVA or the Mann-Whitney unpaired-test was used and *p* values lower than 0.05 were considered significant. The *p*-values with less than 0.05 as \*, less than 0.01 as \*\*, less than 0.001 as \*\*\*, and less than 0.001 as \*\*\*\*.

## Results and discussion

### IL-27-differentiated monocyte-derived DCs resist HIV-1 infection

To define the function of IL-27 during monocyte differentiation into DCs and HIV susceptibility, freshly isolated CD14<sup>+</sup> monocytes were cultured in the absence or presence of 100 ng/ml IL-27 in G4 media as described in the Materials and Methods. iDC and iDC induced in the presence of IL-27 (27DC) were infected with an X4-tropic virus, HIV-1<sub>NL4/3</sub>, or an R5-tropic virus, HIV-1<sub>AD8</sub>, and HIV replication was assessed 14 days after infection, as previously demonstrated [9]. HIV-1<sub>AD8</sub> or HIV-1<sub>NL4.3</sub> replication was reduced by  $95 \pm 3\%$  ( $n = 4$ ,  $p = 0.0087$ ) and  $91 \pm 9\%$  ( $n = 4$ ,  $p = 0.023$ ) in 27DC, respectively, compared to iDC (Fig 1A and 1B). The replication activity of the X4 virus was low in iDCs as our previous report; this was attributed to a lower expression of CXCR4, compared to CCR5 in iDC [9]. Therefore, further studies were focused on HIV-1<sub>AD8</sub> infection.

To elucidate the mechanism underlying this inhibition, we first measured the HIV replication kinetics over 14 days. In iDC, infection spread was detectable from day 5, and HIV replication was robustly amplified on day 7–10 (Fig 1C). In contrast, HIV replication was persistently suppressed in 27DC, with inhibition of replication observed on day 5. This finding indicates that HIV suppression occurs in the early stages of viral replication in 27DC. We then investigated whether the low level of HIV-1 spreading in 27DC was due to the virus particles released from 27DC being less infectious because they contained potential viral-suppressing host factors [68, 69]. Culture supernatants of HIV-infected iDC and 27DC were collected after 14 days of culture and HIV infectious titers in the supernatants were compared. To measure the infectivity of each virus, the 50% tissue culture infective dose (TCID<sub>50</sub>) per ng HIV p24 was quantified using macrophages [59].

Our results from three independent assays indicated that there was no significant difference in the infectivity of virions produced from iDC and 27DC (Fig 1D), implying that the



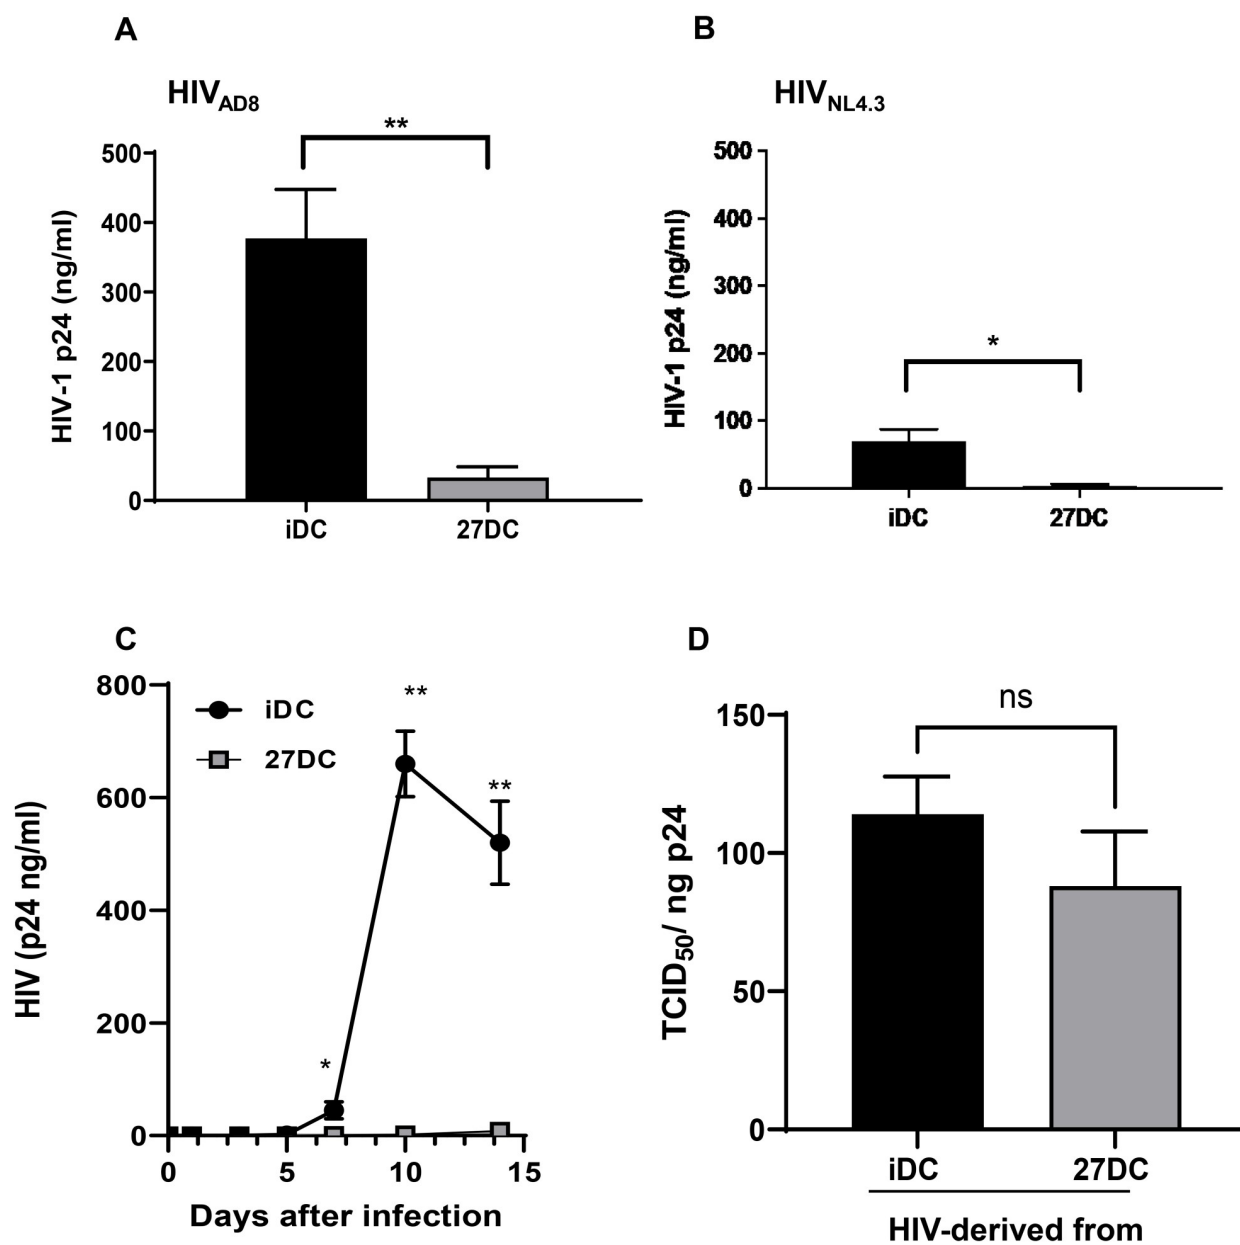

**Fig 1. IL-27 treatment during dendritic cell differentiation inhibits HIV-1 replication without affecting infectability.** (A and B) iDC and 27DC were infected with HIV<sub>AD8</sub> (A) or HIV<sub>NL4.3</sub> (B) at 5000 TCID<sub>50</sub>/10<sup>6</sup> cells as described in the Materials and Methods and then cultured for 14 days in G4 media. Viral replication on day 14 was quantified by measuring HIV p24 antigen in the culture supernatants using an HIV p24 antigen ELISA kit. Results are shown means  $\pm$  SEM from four independent donors' cells. (C) HIV<sub>AD8</sub> replication kinetics in iDC and 27DC were measured. Aliquots of culture supernatants were collected on Days 1, 3, 5, 7, 10, and 14 after infection. HIV-1 p24 released into the supernatant was measured by ELISA. The result is representative of three different donors; data indicates means  $\pm$  SD ( $n = 3$ ). (D) HIV infectious titer, 50% Tissue culture infectious dose (TCID<sub>50</sub>/mL) for virus in culture supernatants of HIV<sub>AD8</sub>-infected iDC and 27DC of 14 days post-infection was quantified by the endpoint assay [67] and then normalized with p24 antigen concentration. Results are shown mean  $\pm$  SEM ( $n = 3$ ) of TCID<sub>50</sub> per ng of p24. Unpaired the Student t test was used to calculate statistical significance, with \* representing  $p < 0.05$ , and \*\* representing  $p < 0.01$ .

<https://doi.org/10.1371/journal.pone.0287829.g001>

inhibition was caused by the suppression of a particular step in the HIV life cycle rather than the incorporation of 27DC-derived antiviral proteins into the virus particles derived from 27DC.

We also analyzed HIV-1's ability to bind to iDC and 27DC. HIV-1<sub>AD.8</sub> was incubated with the cells at 4°C followed by RNA isolation of the virus-cell conjugates. The viral RNA (vRNA) copy number was subsequently quantified in infected iDC and 27DC via qRT-PCR. 27DC expressed  $47 \pm 10\%$  ( $n = 4$ ,  $p = 0.014$ ) less HIV-1 vRNA than iDC (Fig 2A).

The near 50% inhibition of HIV binding might be caused by the downregulation of HIV receptors, CD4 and CCR5. To determine the effect of IL-27 on the expression of CD4 CCR5 on the cell surface, a flow cytometry analysis was performed. CD4 and CCR5 cell surface expression did not significantly change on 27DC compared to that on iDC (Fig 2B). Despite the 50% inhibition of binding, HIV replication in the 27DC was suppressed by more than 90% compared to the iDC. This implies that, in addition to the 50% inhibition of HIV binding, other steps were also influenced in the inhibition. We also compared CXCR4 expression, 27DC had no impact on the expression (Fig 2B).

After the binding of HIV particles to the cell surface, HIV env proteins fuse with the cell membrane, and the core protein in the viral particle is delivered inside the cell. As a result, if the fusion step is further suppressed, an additional inhibition effect between the binding and fusion steps may induce a high level of inhibition in the 27DC. Viral fusion was measured using a Vpr-Blam assay [54]. This assay relies on the incorporation of the  $\beta$ -lactamase-Vpr (Blam-Vpr) chimeric protein into an HIV-1 virion through the co-transfection of pHIVN-LAD8 $\Delta$ Vpr and BlaM-Vpr into 293T cells, as described in the Materials and Methods. This virus was subsequently used to infect iDC or 27DC loaded with CCF2, which is a fluorescent dye substrate for the enzyme  $\beta$ -lactamase. Cleavage of the  $\beta$ -lactam ring in CCF2 following infection resulted in a fluorescence change. A CCR5 antagonist, TAK779 was used as a positive control to inhibit binding followed by viral fusion. Un-cleaved and cleaved CCF2 were detected in the AmCyan and Pacific Blue channel, respectively, by flow cytometry. Cleavage of CCF2 indicated the entry of Blam-Vpr into the cell and viral fusion (Fig 3A).

Compared to iDC, infection of 27DC with HIV-1 containing Blam-Vpr reduced viral fusion by  $43 \pm 4\%$  ( $n = 4$ ,  $p = 0.014$ ) (Fig 3B). These findings are consistent with HIV binding inhibition on 27DC described earlier; therefore, it appears that 27DC inhibits HIV infection by approximately 50% in the binding step, without any impact on the virus-membrane fusion step. Although 27DC suppressed HIV at the binding/entry step by nearly 50%, it abolished HIV replication by  $> 90\%$ , indicating that 27DC further suppressed HIV replication after the fusion step. We previously demonstrated using pseudo-typed replication-incompetent HIV (HIVLuc-VSVG) that IL-27-induced HIV-resistant MDMs suppress the RT step before integration [9]. To elucidate whether 27DC suppressed RT reaction, we used the same technique. HIVLuc-VSVG lacks the HIV envelope gene, encodes a luciferase gene, and expresses a VSVG envelope on the surface of the virus, infecting cells in an HIV receptors-independent manner with a single round of infection and introducing the *Luc* gene. Luciferase activity was therefore considered to correspond to RT activity. The *Luc* activity in 27DC was found to be nearly 90%

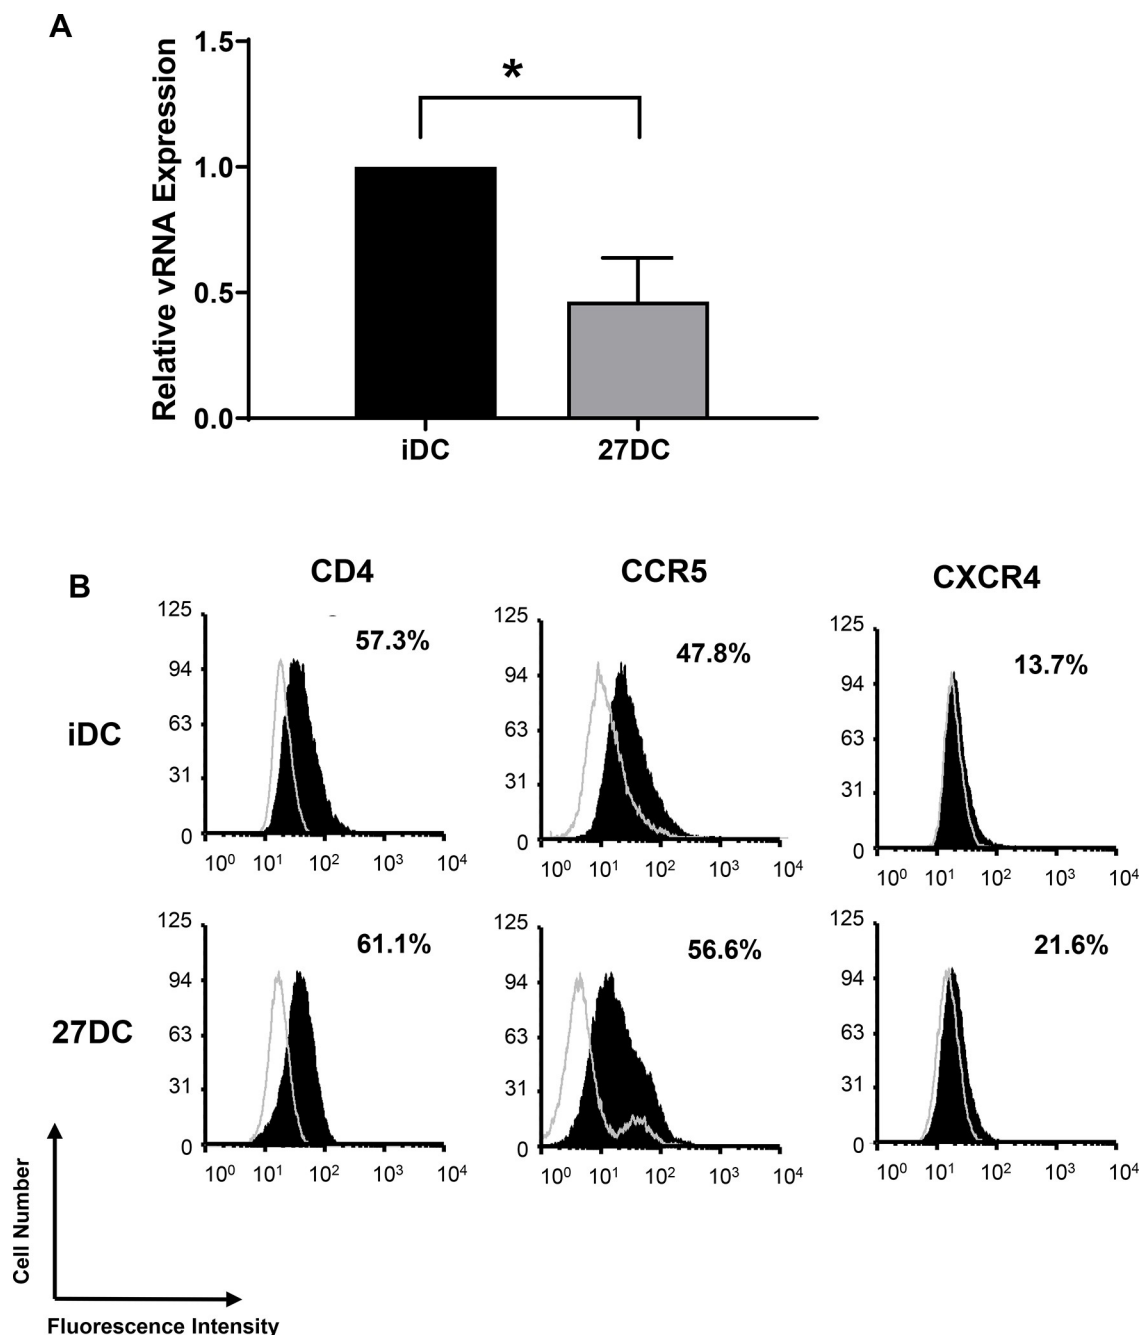

**Fig 2. 27DC partially resists HIV binding.** (A) iDC and 27DC were incubated with HIV-1<sub>AD8</sub> at 4°C for 90 minutes, and then total RNA was extracted. Bound HIV level and amount of GAPDH RNA were measured using real-time RT-PCR. Copy number of HIV-1 Gag was normalized with GAPDH. The data shown represent means  $\pm$  SEM ( $n = 4$ ). \*  $p < 0.05$ . (B) The expression of CD4, CCR5 and CXCR4 on iDC (top panels) and 27DC (bottom panels) was then assessed by flow cytometry as described in “Materials and Methods.” The staining pattern of isotype control antibodies are shown in open histograms and black histograms represent target protein staining. The x-axis and y-axis show fluorescence intensity and cell count, respectively. The data are representative of 3 independent experiments with similar outcomes.

<https://doi.org/10.1371/journal.pone.0287829.g002>

lower than that in iDC (Fig 3C). HIVLuc-VSVG infection was inhibited in 27DC, thus we presumed that 27DC suppress HIV in a manner like that seen in IL-27-induced HIV-resistant MDMs [44], RT reactions may be suppressed in them. To clarify the suppression, we measured

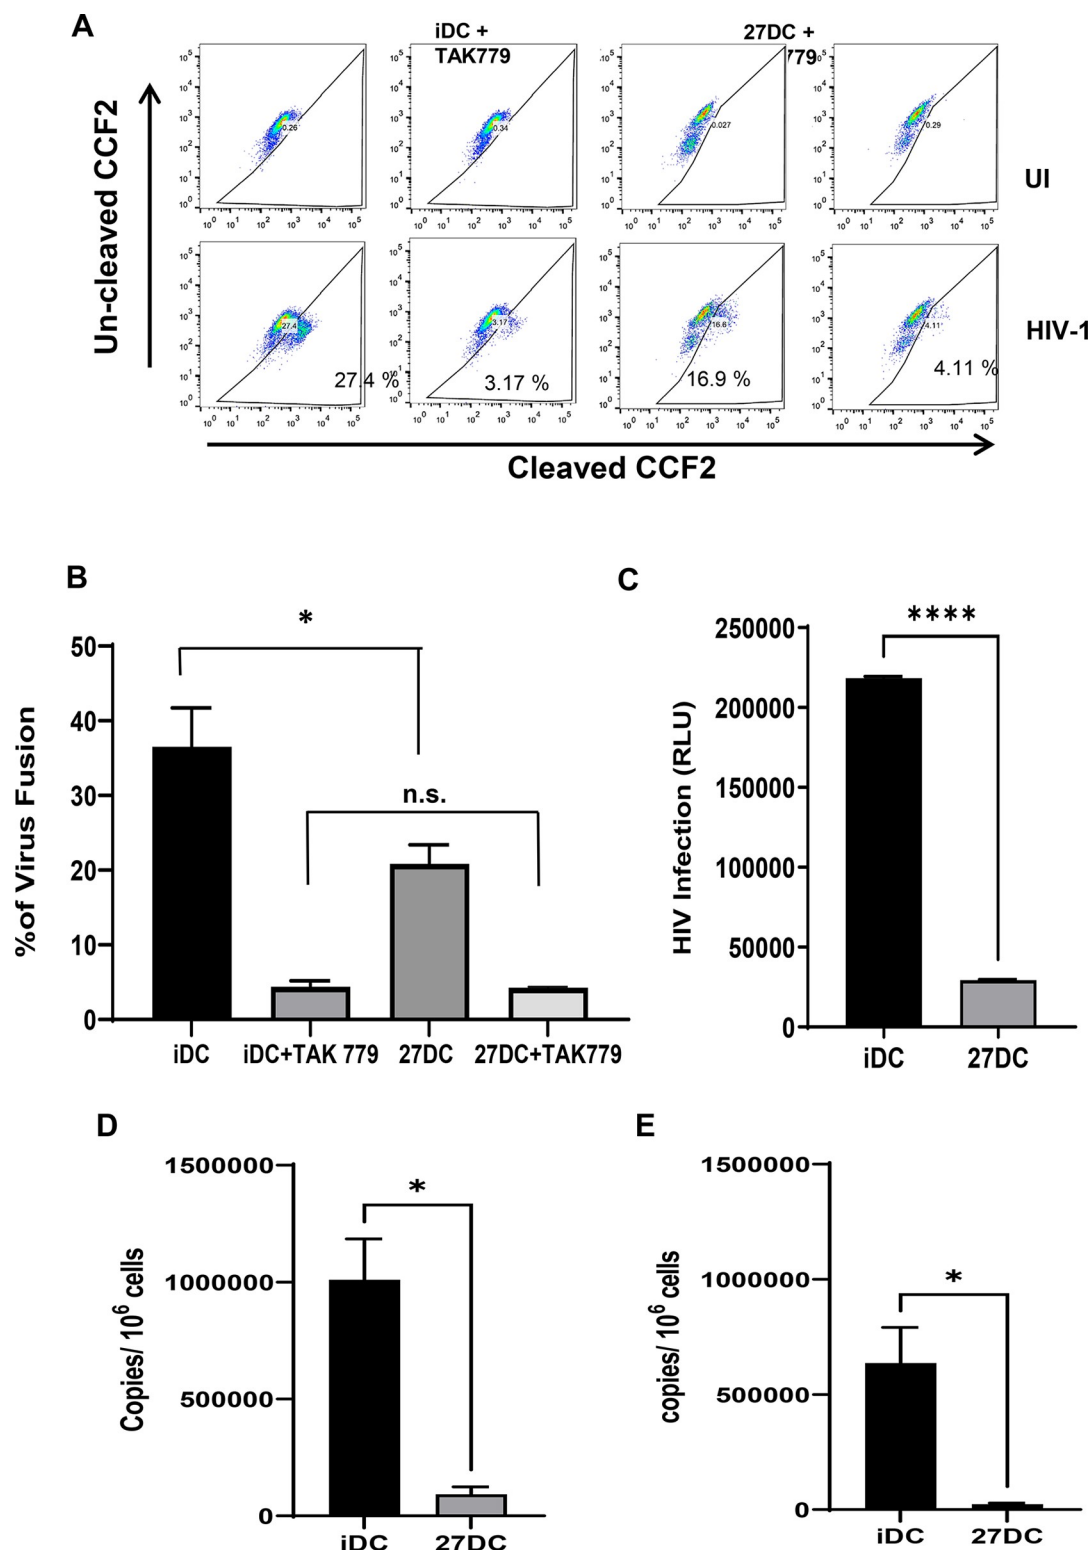

**Fig 3. 27DC inhibit HIV-1 at both viral entry and before integration.** (A) iDC or 27DC were either mock-infected or infected with HIV-1<sub>AD8</sub> virion containing Vpr-Blam for 2 hours. The cells were loaded with the fluorescent dye CCF2. The cleaved substrate of CCF2-AM by Blam was measured by excitation of the substrate at 410 nm and emission shift from green (520nm) to blue (450 nm) dye. As a positive control for suppression of infection/fusion, cells were treated with 10 nM TAK779 before adding HIV and then infected with the HIV. The dot plot is representative of 4 independent experiments. (B)

Percentages of fusion were quantified by detecting CCF2, and the results shown are mean  $\pm$  SEM from four independent studies. (C) iDC and 27DC were infected with pseudotyped HIV-Luc-VSVG for 2 hours and then incubated for 48 hours. Luciferase activity in HIV-Luc-infected iDC and 27DC was measured. The data shows mean  $\pm$  SD. (D and E) HIV-1<sub>AD8</sub>-infected iDC and 27DC were cultured for 24 hours at 37°C. Genomic DNA was extracted and subjected to quantify proviral DNA copy numbers. Primer/probes against the early RT products (D) and the late RT products (E) were utilized [44]. The result is representative of three different donors; data indicates means  $\pm$  SD (n = 3). \*:  $p < 0.05$ , \*\*:  $p < 0.01$ , \*\*\*:  $p < 0.001$ , and \*\*\*\*:  $p < 0.0001$ .

<https://doi.org/10.1371/journal.pone.0287829.g003>

the amount of HIV-1 RT products in iDC and 27DC after HIV infection. The copy numbers of both early and late RT products were measured using qPCR. The 27DC inhibited both late and early RT HIV-1 products compared to iDC (Fig 3D and 3E). The early and the late RT product was inhibited by  $85 \pm 7\%$  (n = 4,  $p = 0.047$ ) and  $87 \pm 8\%$  (n = 4,  $p = 0.037$ ), respectively, compared to iDC (Fig 3D and 3E). These results indicated that 27DC suppress both HIV-1 binding and RT steps (early step in HIV life cycle).

### 27DC has no significant impact on SPTBN1 expression, autophagy induction, or post-translational modification of YB-1

We have previously reported that either downregulation of SPTBN1 [44], the induction of autophagy in macrophages [27], or suppression of acetylation of YB-1 in T cells [70] were associated with IL-27-induced HIV-resistant cells; those changes are associated with HIV resistance via suppression of the RT reaction in the early step in the HIV life cycle. As shown above, 27DC also suppressed the RT reaction, we presumed that one of changes in the host factors might be involved in 27DC. To determine whether these changes were induced in 27DC, western blotting (WB) and an autophagy assay were performed. SPTBN1 was not detected in 27DC or iDC in WB (Fig 4A), and two-dimensional WB demonstrated that the migration of YB-1 in 27DC in the gel was comparable to that in iDC, suggesting that the post-translational modification of YB in 27DC are similar to that in iDC (Fig 4B).

Autophagy assay demonstrated that endogenous autophagy induction in 27DC was not significantly changed (n = 5,  $p = 0.063$ ) (Fig 4C and 4D), which differs from IL-27-induced macrophages [27]. Based on these data, we concluded that 27DC suppressed RT step using a mechanism different from the ones we previously reported in MDMs and T cells.

### Comparison of gene expression profiles

To define the host factor(s) associated with HIV resistance in 27DC, we compared the gene expression profiles between iDC and 27DC with DNA microarrays. The profiles were compared among four donors' iDC and 27DC (Fig 5A).

A total of 51 genes, commonly either up- or downregulated in four donors by more than 3-fold ( $p < 0.05$ ) (S1 Table), were cross-referenced with 2437 previously reported host factors associated with HIV replication. These factors were identified during screening of siRNA, shRNA libraries [71–75] or CRISPR libraries [76–85] and potent IFN-stimulated genes (ISGs) [86]. Cross-reference analysis between our DNA microarray data and the 2437 genes demonstrated that 19 genes were hit as potentially associated with HIV resistance in 27DC.

To identify the host factor in the 19 genes, we conducted literature research. As mentioned above, 27DCs had no significant impact on virus fusion/infectability (Fig 1D) but partially suppressed the HIV binding step (Fig 2A) and the RT reaction (Fig 3D and 3E). Recent studies demonstrated that, after infection, viral core proteins in which RT reaction is processed retain the integrity in the cytosol and prevent mixing of macromolecules within the viral core and the cytosolic environment just before integration [87, 88]; therefore, we presumed that the RT inhibition in 27DC may be caused by direct or indirect interaction of uncharacterized host



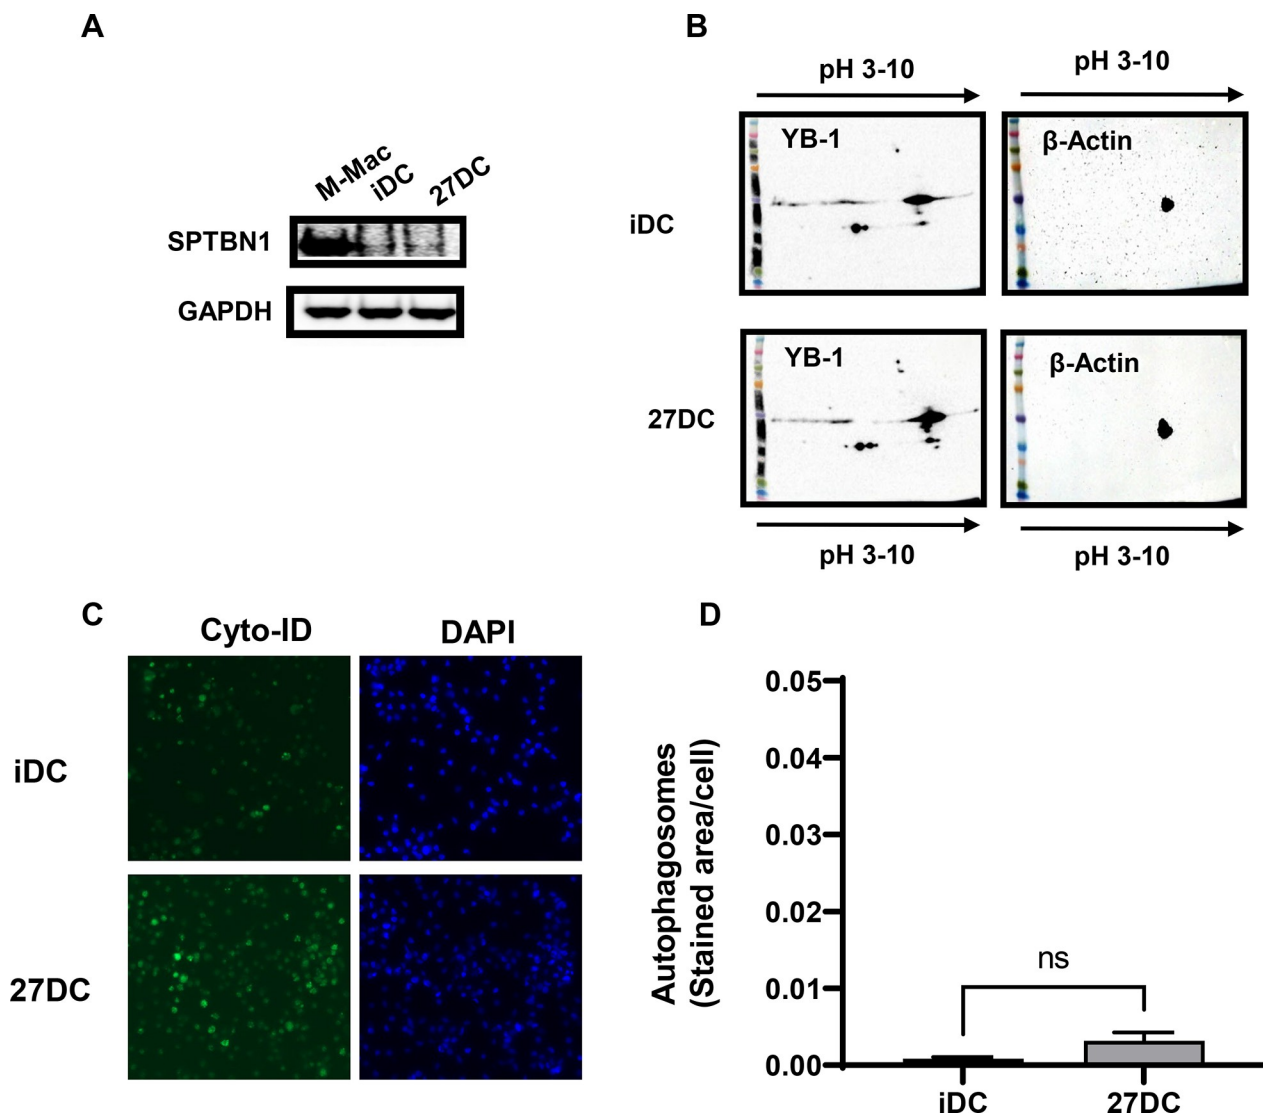

**Fig 4. 27DC has no impact on the expression of SPTBN1 and PTM of YB1 and the induction of autophagy.** (A) Whole cell lysates of iDC and 27DC were subjected for detecting SPTBN1 expression by Western blotting using an anti-SPTBN1 antibody. As an internal control, GAPDH was detected, and as a positive control for SPTBN1 expression, whole cell lysate of macrophage induced by M-CSF was used [44]. (B) The post-translational modification (PTM) of YB-1 was measured by 2-dimensional-gel electrophoresis followed by western blot using an anti-YB1 antibody. As a loading control,  $\beta$ -actin was detected. The pI of unacetylated YB-1 is pH5.74. (C and D) Autophagy inducing activity was compared between iDC and 27DC using the Cyto-ID reagent as previously described [2]. iDC and 27DC were incubated 6 hours in a 96-well plate. Autophagosome staining was performed using the Cyto-ID reagent and Hoechst 33342 as a counterstain. DAPI staining was conducted as a nuclear counterstain. (C) 2x3 composite images were taken on a Zeiss AxioObserver motorized microscope. (D) Autophagy induction in iDC and 27DC was measured. The average stained area per cell for each condition was calculated [27]. Data shows mean  $\pm$  SEM ( $n = 4$ ).

<https://doi.org/10.1371/journal.pone.0287829.g004>

cytosolic factor(s) to the core protein rather than cell surface proteins regulating HIV infectability, or nuclear/DNA-binding proteins, and sought cytosolic factors in the 19 genes.

In the 19 genes, total 10 genes encoding transcriptional factors, or cell surface receptors were excluded. Among the remaining nine genes, six genes: guanylate binding protein (GBP)-1, GBP-2, GBP-4, and GBP-5, IFN-induced protein with tetratricopeptide repeats 3 (IFIT3), and IFN alpha inducible protein 6 (IFI6), have been investigated anti-HIV properties. GBP proteins are incorporated in virus particles, and GBP1, GBP2, and GBP5, but not GBP4, suppress HIV infectability [89, 90]. IFIT3 inhibits the translation of viral proteins [91]. IFI6

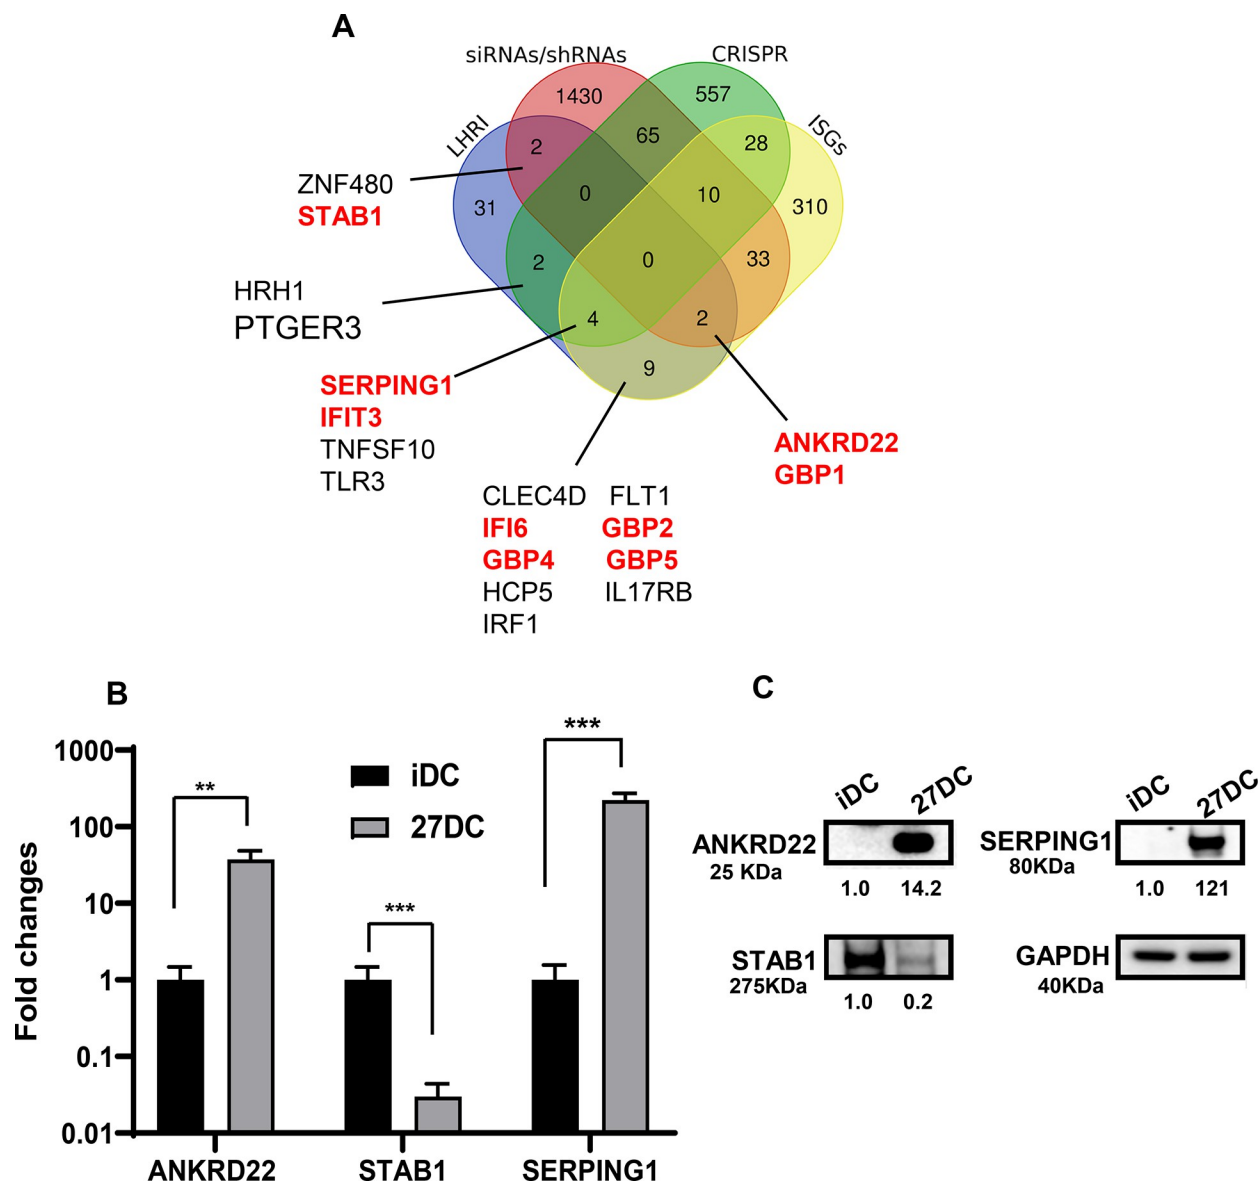

**Fig 5. Comparison of gene and protein expression between iDC and 27DC.** (A). A microarray analysis was performed on iDC and 27DC from 4 different donors, and a total of 51 genes (S1 Table) were significantly changed by > 3-fold in 27DC. The Venn diagram analysis was conducted using reported genes associated with HIV replication by siRNA/shRNA screening (siRNAs/shRNAs), CRISPR libraries screening (CRISPR), and the reported Interferon-stimulated genes (ISGs). Of 51, 19 genes overlapped with the reported genes. The gene names with the red font were targeted for further analysis. The genes with black font encode receptors or transcriptional factors. (B) The qRT-PCR was conducted to define the expression level of each gene of interest using total cellular RNA from iDC and 27DC from three independent donors. Data show mean  $\pm$  SEM from three independent donors' cells. (C) The total cellular protein lysate was collected from iDC and 27DC, and Western blotting was performed using anti-ANKRD22, anti-STAB1, anti-SERPING1, and anti-GAPDH antibodies. The band intensity of each protein was normalized by the band intensity of GAPDH (Image J); the values are indicated below images.

<https://doi.org/10.1371/journal.pone.0287829.g005>

induces autophagy cell-type dependent and inhibits HIV [92, 93]. Therefore, the anti-HIV effects of the six genes were not related with HIV RT reaction; they were excluded from the potential host factors. The remaining three genes: ankyrin repeat domain 22 (ANKRD22) and serpin family G member 1 (SERPING1) and Stabilin 1 (STAB1) were subjects to further study. Of note, STAB1 is a cell surface scavenger receptor [94, 95], however, it is known that the downregulation of STAB1 expression induces the production of CCL3, an R5 HIV binding

inhibitor [96]; therefore, we included it in the downstream analysis. To confirm the expression of each gene, qRT-PCR was performed. The gene expression levels in 27DC were normalized to the expression of an internal control, GAPDH, and compared to the expression levels in iDC (Fig 5B).

The expression of each protein was confirmed by Western blotting using whole-cell lysates of iDC and 27DC (Fig 5C and S1 Fig). The expression of ANKRD22 and SERPING1 in 27DC increased by  $19.4 \pm 2.5$ -fold ( $p = 0.0075$ ,  $n = 4$ ) and  $67.9 \pm 21.9$ -fold ( $p = 0.025$ ,  $n = 3$ ), respectively, compared to that in iDC. In contrast, STAB1 expression in 27DC was suppressed by  $85 \pm 6.7\%$  ( $p = 0.014$ ,  $n = 4$ ), compared to iDC.

### Evaluation of a role of ANKRD22 expression in 27DC on HIV replication

ANKRD22 is a member of the ankyrin family [97–99], which interact with spectrin protein [100], and the ankyrin protein is considered a novel viral entry inhibitor [101]. It is reported that the expression of ANKRD22 is associated with chronic HIV infection in macrophages and T cells [102]; however, the impact of ANKRD22 on HIV replication has not been reported. As a result, we attempted to evaluate the ANKRD22 effect on RT reaction by knocking down ANKRD22 using siRNA against ANKRD22 (si-ANKRD22). To suppress the inducing ANKRD22 mRNA, we first performed a kinetic study of its expression. Monocytes were cultured in the absence or presence of IL-27, and cells were harvested from day-1 to -7. We found that ANKRD22 was induced in IL-27-treated cells within 24 hours (Fig 6A), thus we decided to transfect si-ANKRD22 into monocytes before starting IL-27 treatment. As a control, non-targeting siRNA (si-Ctrl) were delivered into monocytes as described in the Materials and Methods. We expected no significant changes in HIV infection in iDC transfected with either si-Ctrl or si-ANKRD22, and a certain level of recovery of HIV replication in si-ANKRD22-transfected 27DC and no-change in si-Ctrl-transfected 27DC; however, as shown in Fig 6B, si-Ctrl and si-ANKRD22-transfected iDC demonstrated significant downregulation of HIV infection by  $88.2 \pm 4.4\%$  ( $n = 5$ ,  $p = 0.0012$ ) and  $89.7 \pm 4.0\%$  ( $n = 5$ ,  $p = 0.0011$ ), respectively. In the case of the experiments of siRNA transfection into 27DC, the mock-transfected 27DC inhibited HIV infection by  $95.2 \pm 11.0\%$  ( $n = 5$ ,  $p < 0.0001$ ) and si-Ctrl transfection further suppressed HIV infection in 27DC by  $99.7 \pm 4.1\%$  ( $n = 5$ ,  $p < 0.0001$ ) compared iDC; however, si-ANKRD22 administration in 27DC did not restore HIV infection in 27DC. These results suggested that siRNA transfection induced an off-target effect and suppressed HIV in both iDC and 27DCs. Since siRNA transfection suppressed HIV in even in iDC (control cells), we could not assess siRNA effect in 27DC, precisely. siRNA transfection downregulates the target gene's expression and often inhibits unintended genes or induces antiviral genes as off-target effects [103–106]. To define whether IFN genes were induced by the siRNA transfection in iDC as one of off target effect, the gene expression was monitored by real-time RT-PCR. The result demonstrated that si-Ctrl transiently induced IFN- $\beta$  and IFN- $\alpha 14$  on day 4. In contrast, si-ANKRD22 induced IFN- $\lambda 1$  on day 4 and IFN- $\alpha 8$ , IFN- $\alpha 14$  and IFN- $\beta$  within day 7 (S2 Fig), implicating that si-RNA transfection induces IFNs as an off-target effect, which may induce IFN-mediated anti-HIV effect in DC, accordingly, we could not precisely determine a role of host factors including ANKRD22 using siRNAs.

As an alternative approach, the overexpression of ANKRD22 in iDC was attempted. A plasmid DNA encoding ANKRD22 gene (pANKRD22) was transfected into iDC or monocytes using lipids: Lipofectamin2000 (ThermoFisher), JetPEI (Polyplus), FuGENE6 (Promega), TransIT-LT1 (Mirus Bio), and Effecten (Qiagen), or electroporation using P3 reagent; however, all attempted methods displayed strong cytotoxicity, thus we failed to define a role of the overexpressed ANKRD22 on HIV infection in iDC. To define a role of ANKRD22 expression, we

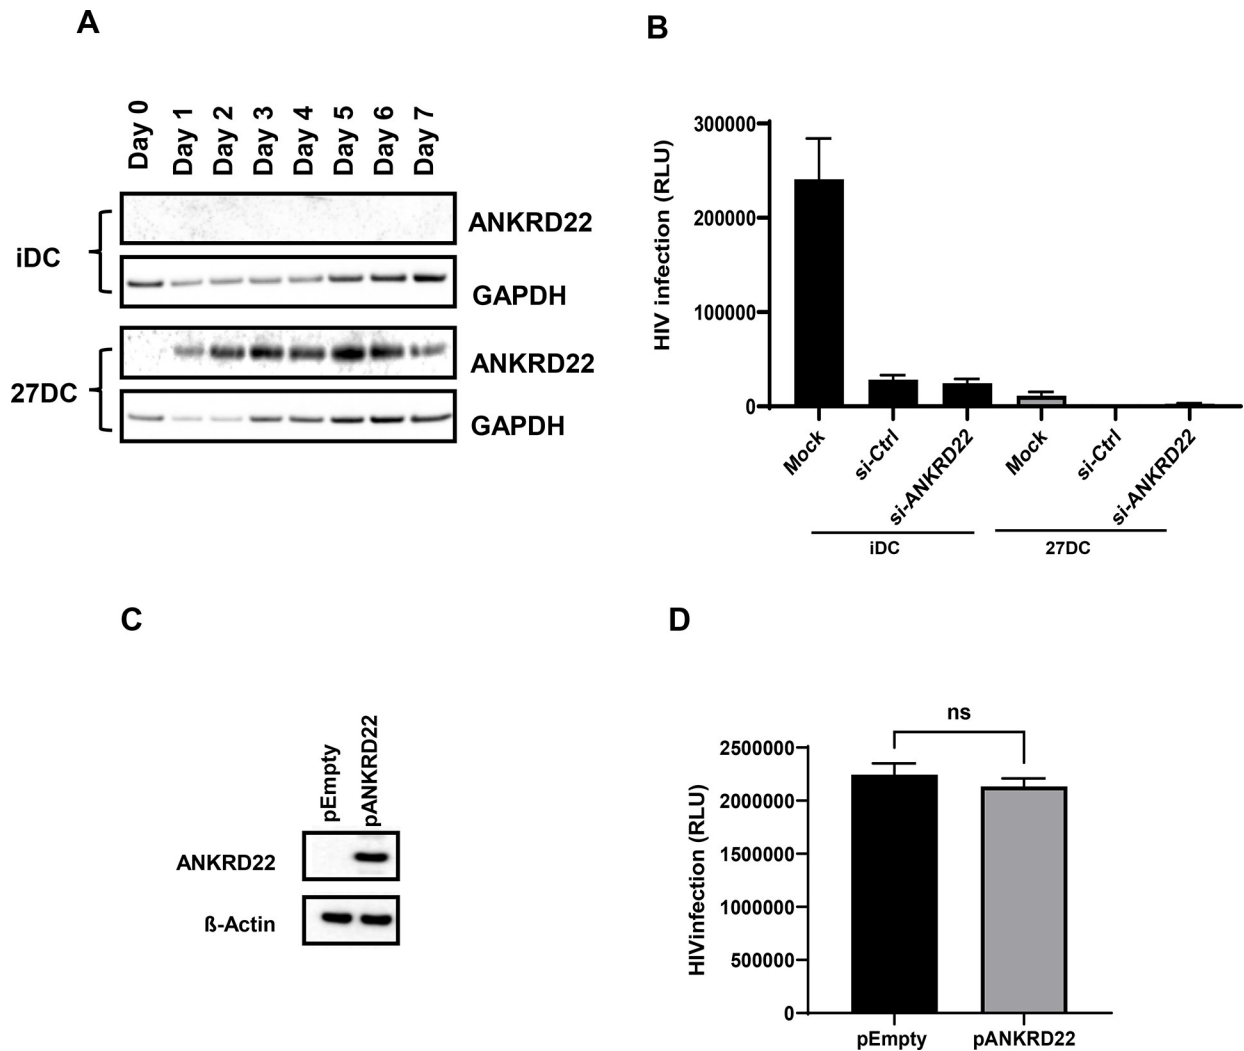

**Fig 6. ANKRD22 expression has no impact on HIV infection.** (A) Monocytes were differentiated into iDC or 27DC in G4 media in the absence or presence of IL-27. Cell aliquots were collected every day and whole cell lysate was subjected for detecting ANKRD 22 expression by WB using anti-ANKRD22 antibody. As internal loading control, GAPDH expression was detected. (B) Control siRNA (si-Ctrl) and siRNA targeting ANKRD22 (si-ANKRD22) (Thermo Fisher) was transfected into monocyte using HiPerFect, and then differentiated to iDC or 27DC. The cells were recovered and then infected with HIVLuc as described in the Materials and Methods, Luciferase activity on 48 hours after infection was quantified. A representative result from three independent assays is presented as means  $\pm$  SDs ( $n = 5$ ). (C, D) empty plasmid (pEmpty) or ANKRD22-encoding plasmid (pANKRD22) was transfected into HEK293T cells for 48 hours, aliquots of cells were subject for Western blot to detect ANKRD 22 expression (C) and remaining cells were infected with HIV-Luc (D) and then HIV infection was quantified by Luciferase activity. Representative data from three independent assays are presented as means  $\pm$  SDs ( $n = 3$ ).

<https://doi.org/10.1371/journal.pone.0287829.g006>

transfected the pANKRD22 into HEK293T cells, which do not induce IFN production in response to transfected DNA because of the lack of STING [61]. Although transfection induced the gene product (Fig 6C), the expression had no significant impact on HIV infection using pseudotyped HIVLuc-VSVG (Fig 6D), thus we concluded that ANKRD22 had no impact on HIV infection in HEK293T cells, however a role of the protein in 27DCs is still unknown.

### Evaluation of a role of STAB1 or SERPING1 in 27DC on HIV replication

STAB1 is a cell surface protein and acts as a scavenger receptor [94, 95]. It is reported that the suppression of STAB1 expression is associated with increased production of CCL3 (also

known as macrophage inflammatory protein (MIP)-1 alpha) without an increase in CCL3 gene activation [96]. Although the mechanism of the STAB1-mediated regulation of CCL3 production is unknown, If the 27DC produces CCL3 due to the down regulation of STAB1, the induced CCL3 might affect the suppression of HIV binding as shown in Fig 2A, thus, we assessed the secretion of CCL3 during the induction of 27DC. Culture supernatants from iDC and 27DC were collected on day 7, and the CCL3 was quantified. The results indicated that CCL3 was significantly secreted in 27DC culture supernatants (Fig 7A). Results from Microarray analysis and qRT-PCR assay demonstrated that compared to iDC, CCL3 gene expression

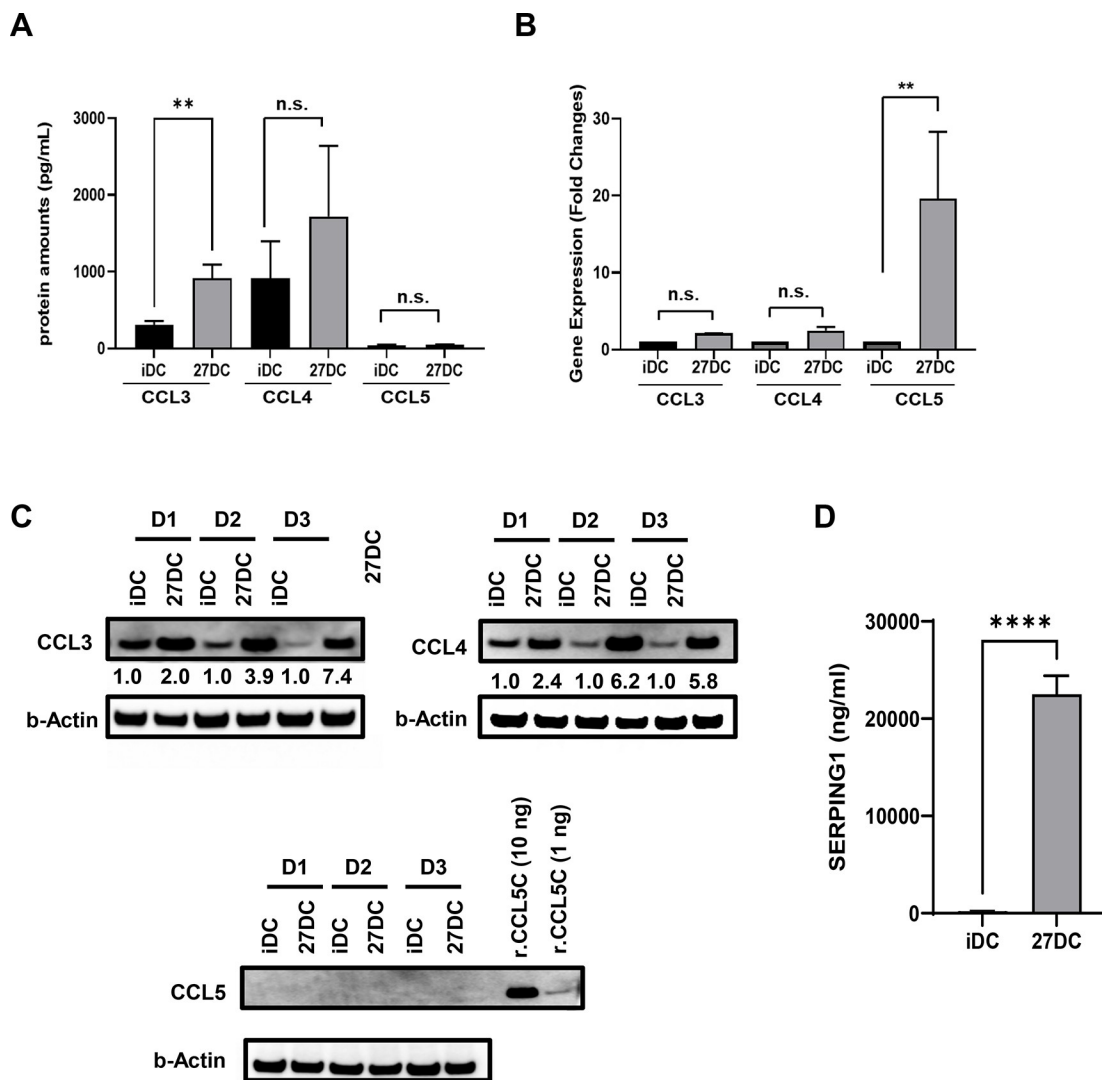

**Fig 7. 27DC produce CCL3 and SERPING1 in culture supernatants.** (A) The concentrations of secreted CCL3, CCL4 and CCL5 in culture supernatants on day 7 were measured by ELISA. A total of eight different donor culture supernatants were subjected to the assay. (B) Real-time RT-PCR was conducted to compare the expression level of CCL3, CCL4 and CCL5 gene. Data show mean  $\pm$  SEM from three independent donors' cells. (C) The total cellular protein lysate was collected from three independent donors' iDC and 27DC, Western blotting was performed using anti-CCL3, anti-CCL4, anti-CCL5, and anti- $\beta$ -actin antibodies. As a positive control for WB, 10 ng and 1 ng recombinant CCL5 (R&D system) was used. The band intensity of each protein was normalized by the band intensity of  $\beta$ -actin (Image J); the values are indicated below images. (D) The concentrations of secreted SERPING1 in culture supernatants on day 7 were measured by ELISA. A total of eight different donor culture supernatants were subjected to the assay. Data indicates mean  $\pm$  SEM (n = 8). \*\*:  $p < 0.01$ , \*\*\*:  $p < 0.001$ , and \*\*\*\*:  $p < 0.0001$ .

<https://doi.org/10.1371/journal.pone.0287829.g007>



was changed in 27DC by  $1.37 \pm 0.28$ -fold ( $n = 4$ ,  $p = 0.329$ ) and  $2.2 \pm 0.06$ -fold ( $n = 3$ ,  $p = 0.317$ ) (Fig 7B), respectively, however, intracellular CCL3 protein in 27DC was increased by  $4.4 \pm 1.3$  ( $n = 3$ ,  $p = 0.045$ ) (Fig 7C). These results consisted of previous reports [96]; the downregulation of STAB1 induced CCL3 protein without a change in the gene expression. CCL3 is a member of CCR5 ligands; therefore, we also examined the secretion of other CCR5 ligands, CCL4 (MIP1-beta) and CCL5 (RANTES), in the culture supernatants. The quantification assay displayed that CCL4 protein was not significantly secreted from 27DC and CCL5 protein was not detected (below detection limits) in the 27DC culture supernatants (Fig 7A). The qRT-PCR demonstrated that CCL4 mRNA expression in 27DC was not significantly changed ( $2.4 \pm 0.4$ -fold,  $n = 3$ ,  $p = 0.17$ ) but CCL4 protein was increased by  $4.8 \pm 0.98$ -fold ( $n = 3$ ,  $p = 0.0076$ ) in 27DC cytosol (Fig 7B and 7C), suggesting that CCL4 protein accumulated in the cytosol in 27DC. On the contrary, CCL5 gene expression was  $19.6 \pm 8.7$ -fold increased ( $n = 3$ ,  $p = 0.0096$ ) compared to iDC (Fig 7B), however, CCL5 protein expression was low or below the level of detection ( $< 1$  ng) in the 27DC cytosol (Fig 7C). Overall, 27DC uniquely produces CCL3 during differentiation. This inducing activity in 27DC may contribute to the partial suppression of HIV binding (Fig 2A).

SERPING1, also known as C1 inhibitor (C1INH), is a member of the plasma serine protease serpin superfamily [107]. It is mainly produced from the endothelium and inhibits both the classical (C1r and C1s) and mannose-binding lectin-associated serine protease (MASP)1/MASP2 complement pathways, as well as enzymes involved in fibrinolytic pathway, intrinsic coagulation, and contact systems, such as plasmin, factor XI, factor XII, and plasma kallikrein [107, 108]. It is induced by IFNs [109, 110]. To define whether SERPING1 is produced from 27DC, the protein amounts was quantified using an ELISA kit. The results indicated that SERPING1 was significantly produced from 27DC (Fig 7C), suggesting that IL-27 can induce the protein like IFNs, and it may affect HIV infection during differentiation. To assess anti-HIV effect of SERPING1, iDC was cultured with 20  $\mu$ g/mL of recombinant SERPING1 proteins for three days and then HIV infection assay was conducted using HIVLuc-VSVG. The result displayed that SERPING1 had no impact on HIV infection (S3 Fig).

## Conclusions

The current study revealed that IL-27 differentiated monocytes into HIV-resistant DC, suppressing R5 HIV binding to the cells and the HIV RT reaction after viral entry. This suppression mechanism differs from the previously reported IL-27-induced HIV-resistant macrophages or T cells; the anti-viral effect mediated via SPTBN1, autophagy, or YB1-dependent mechanisms [27, 44, 45], indicating that IL-27 can induce HIV-resistant cells in a cell type-dependent manner. Due to failing knockdown by siRNA or overexpression of protein by plasmid transfection in 27DC or iDC, the molecular mechanisms underlying the inhibition of HIV in 27DC remain unknown. RT reaction processed in the core protein by protecting cytosolic envelopment [87]. Therefore, in 27DC, post-translational modification of unidentified host protein(s) interacting with the core or change in cell metabolism affecting cytosolic microenvironment or might directly or indirectly affect the RT reaction in the core protein in 27DC; we need further study to elucidate the mechanism of the inhibition in 27DCs. We found that 27DC induces CCL3 and SERPING1 production during differentiation; CCL3 protects against R5 HIV infection in DC, macrophages, and T cells [111]. DCs promote *cis*- and *trans*-HIV infection [10, 13]. Therefore, if 27DC is cultured with other cell types, macrophages, or T cells, the secreted CCL3 may inhibit HIV infection in the cocultured cells by *trans*; further characterization of 27DC on cell-to-cell transmission in HIV infection may provide new insights into regulating HIV transmission and HIV replication.

SERPING1 functions as the major inhibitor of C1r, C1s, mannose-binding lectin-associated serine protease MASP-1, MASP-2, factor XII and kallikrein in the contact system, factor XI and thrombin in the coagulation system, and tissue plasminogen-activator and plasmin in the fibrinolytic system [112–115] and SERPING1 is proposed as a useful adjunct in the management of COVID-19 with severe pneumonia [116]. Thus, IL-27 primarily affects HIV-1 replication and potentially other viral infections, including SARS-Cov2 infection. Further research is needed to provide new insights into biological function of IL-27 and cellular function of 27DC and explore IL-27's potential as a therapeutic cytokine.

## Supporting information

**S1 Fig. Comparison of protein expression between iDC and 27DC.** The total cell lysate was collected from iDC and 27DC of three different donors, and Western blotting was performed using anti-ANKRD22, anti-STAB1, and anti-beta Actin antibodies. The band intensity of each protein was normalized by the band intensity of GAPDH (Image J); the values are indicated below images.

(PDF)

**S2 Fig. Validation of interferon activation upon siRNA transfection into iDC.** Monocytes ( $1 \times 10^7$  cells) were transfected with si-Ctrl or si-ANKRD22 using HiPerFect (Qiagen) as described in the Materials and Methods. As a control, monocytes were mock treated with HiPerFect alone. The transfected cells were cultured for 7 days in G4-media. The cells were collected for RNA extraction on day-4 and day-7. Relative IFN- $\alpha$ 8, IFN- $\alpha$ 14, IFN- $\beta$ , or IFN- $\lambda$ 1 expression was measured by qRT-PCR. two independent assay was performed, and one of the representative dates is shown. Data are shown as mean  $\pm$  SD ( $n = 3$ ), and the gene expression level was compared to mock-treated cells. \*\*  $p < 0.01$ , \*\*\*  $p < 0.001$ .

(PDF)

**S3 Fig. Impact of SERPING1 pulse-treatment of iDC on HIV infection.** iDC were cultured with 20  $\mu$ g/mL of recombinant SERPING1 for 3 days and then infected with HIVLuc as described in the Materials and Methods. HIV infection was quantified by luciferase assay. Data show Mean  $\pm$  SD ( $n = 3$ ) of a representative data from two independent assays.

(PDF)

**S1 Table. A list of differentially expressed gene.** Differentially expressed gene candidates were selected for verification with an absolute fold change difference greater than 3.0 with significant differences ( $p < 0.05$ ) determined by two-way ANOVA between iDC and 27DC in each donor. Total 51 genes, commonly either up- or downregulated in four donors were selected by Venn diagram analysis.

(PDF)

**S1 Raw images.**

(PDF)

## Acknowledgments

Authors thank HC. Lane and MW. Baseler for supporting this project, W. Greene for kindly providing pHIV-1<sub>NL4/3</sub>-Env<sub>AD.8</sub>- $\Delta$ Vpr and pVpr-BLAM, D. Poudyal for discussion, M. Bosche for technical support. All authors thank MA. Martin for providing pNL4.3 and pAd8, and D. Yang for providing reagents. Authors thank W. Chang for critical reading. The content of this publication does not necessarily reflect the views or policies of the Department of Health and Human Services, nor does mention of trade names, commercial products, or organizations

imply endorsement by the U.S. Government. This research was supported [in part] by the National Institute of Allergy and Infectious Disease.

## Author Contributions

**Conceptualization:** Tomozumi Imamichi.

**Data curation:** Tomozumi Imamichi, Qian Chen, Bharatwaj Sowrirajan, Sylvain Laverdure, Mayra Marquez, Anthony R. Mele, Catherine Watkins, Joseph W. Adelsberger, Jeanette Higgins.

**Formal analysis:** Tomozumi Imamichi, Bharatwaj Sowrirajan, Jun Yang, Sylvain Laverdure, Mayra Marquez, Joseph W. Adelsberger, Jeanette Higgins, Hongyan Sui.

**Funding acquisition:** Tomozumi Imamichi.

**Methodology:** Bharatwaj Sowrirajan, Sylvain Laverdure.

**Supervision:** Tomozumi Imamichi.

**Validation:** Tomozumi Imamichi.

**Visualization:** Tomozumi Imamichi.

**Writing – original draft:** Tomozumi Imamichi.

**Writing – review & editing:** Tomozumi Imamichi.

## References

1. Inaba K, Inaba M, Naito M, Steinman RM. Dendritic cell progenitors phagocytose particulates, including bacillus Calmette-Guerin organisms, and sensitize mice to mycobacterial antigens in vivo. *J Exp Med*. 1993; 178(2):479–88. Epub 1993/08/01. <https://doi.org/10.1084/jem.178.2.479> PMID: 7688024; PubMed Central PMCID: PMC2191128.
2. Svensson M, Stockinger B, Wick MJ. Bone marrow-derived dendritic cells can process bacteria for MHC-I and MHC-II presentation to T cells. *J Immunol*. 1997; 158(9):4229–36. Epub 1997/05/01. PMID: 9126984.
3. Nijman HW, Kleijmeer MJ, Ossevoort MA, Oorschot VM, Vierboom MP, van de Keur M, et al. Antigen capture and major histocompatibility class II compartments of freshly isolated and cultured human blood dendritic cells. *J Exp Med*. 1995; 182(1):163–74. Epub 1995/07/01. <https://doi.org/10.1084/jem.182.1.163> PMID: 7790816; PubMed Central PMCID: PMC2192095.
4. Bhardwaj N, Bender A, Gonzalez N, Bui LK, Garrett MC, Steinman RM. Influenza virus-infected dendritic cells stimulate strong proliferative and cytolytic responses from human CD8+ T cells. *J Clin Invest*. 1994; 94(2):797–807. Epub 1994/08/01. <https://doi.org/10.1172/JCI117399> PMID: 8040335; PubMed Central PMCID: PMC296160.
5. Cella M, Scheidegger D, Palmer-Lehmann K, Lane P, Lanzavecchia A, Alber G. Ligation of CD40 on dendritic cells triggers production of high levels of interleukin-12 and enhances T cell stimulatory capacity: T-T help via APC activation. *J Exp Med*. 1996; 184(2):747–52. Epub 1996/08/01. <https://doi.org/10.1084/jem.184.2.747> PMID: 8760829; PubMed Central PMCID: PMC2192696.
6. Steinman RM, Granelli-Piperno A, Pope M, Trumpfheller C, Ignatius R, Arrode G, et al. The interaction of immunodeficiency viruses with dendritic cells. *Curr Top Microbiol Immunol*. 2003; 276:1–30. Epub 2003/06/12. [https://doi.org/10.1007/978-3-662-06508-2\\_1](https://doi.org/10.1007/978-3-662-06508-2_1) PMID: 12797441.
7. Wilen CB, Tilton JC, Doms RW. HIV: cell binding and entry. *Cold Spring Harb Perspect Med*. 2012; 2(8). Epub 2012/08/01. <https://doi.org/10.1101/cshperspect.a006866> PMID: 22908191; PubMed Central PMCID: PMC3405824.
8. Kawamura T, Gulden FO, Sugaya M, McNamara DT, Borris DL, Lederman MM, et al. R5 HIV productively infects Langerhans cells, and infection levels are regulated by compound CCR5 polymorphisms. *Proc Natl Acad Sci U S A*. 2003; 100(14):8401–6. Epub 2003/06/18. <https://doi.org/10.1073/pnas.1432450100> PMID: 12815099; PubMed Central PMCID: PMC166241.
9. Chen Q, Swaminathan S, Yang D, Dai L, Sui H, Yang J, et al. Interleukin-27 is a potent inhibitor of cis HIV-1 replication in monocyte-derived dendritic cells via a type I interferon-independent pathway.

- PLoS One. 2013; 8(3):e59194. Epub 20130320. <https://doi.org/10.1371/journal.pone.0059194> PMID: 23527130; PubMed Central PMCID: PMC3604098.
10. Wu L, KewalRamani VN. Dendritic-cell interactions with HIV: infection and viral dissemination. *Nat Rev Immunol*. 2006; 6(11):859–68. <https://doi.org/10.1038/nri1960> PMID: 17063186; PubMed Central PMCID: PMC1796806.
  11. Arrighi JF, Pion M, Garcia E, Escola JM, van Kooyk Y, Geijtenbeek TB, et al. DC-SIGN-mediated infectious synapse formation enhances X4 HIV-1 transmission from dendritic cells to T cells. *J Exp Med*. 2004; 200(10):1279–88. Epub 2004/11/17. <https://doi.org/10.1084/jem.20041356> PMID: 15545354; PubMed Central PMCID: PMC2211914.
  12. Granelli-Piperno A, Delgado E, Finkel V, Paxton W, Steinman RM. Immature dendritic cells selectively replicate macrophagetropic (M-tropic) human immunodeficiency virus type 1, while mature cells efficiently transmit both M- and T-tropic virus to T cells. *J Virol*. 1998; 72(4):2733–7. Epub 1998/04/03. <https://doi.org/10.1128/JVI.72.4.2733-2737.1998> PMID: 9525591; PubMed Central PMCID: PMC109716.
  13. Granelli-Piperno A, Finkel V, Delgado E, Steinman RM. Virus replication begins in dendritic cells during the transmission of HIV-1 from mature dendritic cells to T cells. *Curr Biol*. 1999; 9(1):21–9. Epub 1999/01/16. [https://doi.org/10.1016/s0960-9822\(99\)80043-8](https://doi.org/10.1016/s0960-9822(99)80043-8) PMID: 9889121.
  14. Mangeat B, Turelli P, Caron G, Friedli M, Perrin L, Trono D. Broad antiretroviral defence by human APOBEC3G through lethal editing of nascent reverse transcripts. *Nature*. 2003; 424(6944):99–103. Epub 2003/06/17. <https://doi.org/10.1038/nature01709> PMID: 12808466.
  15. Neil SJ, Zang T, Bieniasz PD. Tetherin inhibits retrovirus release and is antagonized by HIV-1 Vpu. *Nature*. 2008; 451(7177):425–30. Epub 2008/01/18. <https://doi.org/10.1038/nature06553> PMID: 18200009.
  16. Van Damme N, Goff D, Katsura C, Jorgenson RL, Mitchell R, Johnson MC, et al. The interferon-induced protein BST-2 restricts HIV-1 release and is downregulated from the cell surface by the viral Vpu protein. *Cell Host Microbe*. 2008; 3(4):245–52. Epub 2008/03/18. <https://doi.org/10.1016/j.chom.2008.03.001> PMID: 18342597; PubMed Central PMCID: PMC2474773.
  17. Colomer-Lluch M, Ruiz A, Moris A, Prado JG. Restriction Factors: From Intrinsic Viral Restriction to Shaping Cellular Immunity Against HIV-1. *Front Immunol*. 2018; 9:2876. Epub 20181206. <https://doi.org/10.3389/fimmu.2018.02876> PMID: 30574147; PubMed Central PMCID: PMC6291751.
  18. Fakruddin JM, Lempicki RA, Gorelick RJ, Yang J, Adelsberger JW, Garcia-Pineres AJ, et al. Noninfectious papilloma virus-like particles inhibit HIV-1 replication: implications for immune control of HIV-1 infection by IL-27. *Blood*. 2007; 109(5):1841–9. Epub 2006/10/28. <https://doi.org/10.1182/blood-2006-02-001578> PMID: 17068156; PubMed Central PMCID: PMC1801045.
  19. Imamichi T, Yang J, Huang DW, Brann TW, Fullmer BA, Adelsberger JW, et al. IL-27, a novel anti-HIV cytokine, activates multiple interferon-inducible genes in macrophages. *Aids*. 2008; 22(1):39–45. Epub 2007/12/20. <https://doi.org/10.1097/QAD.0b013e3282f3356c> PMID: 18090390.
  20. Guzzo C, Jung M, Graveline A, Banfield BW, Gee K. IL-27 increases BST-2 expression in human monocytes and T cells independently of type I IFN. *Sci Rep*. 2012; 2:974. Epub 20121213. <https://doi.org/10.1038/srep00974> PMID: 23240078; PubMed Central PMCID: PMC3521153.
  21. Hasegawa H, Mizoguchi I, Chiba Y, Ohashi M, Xu M, Yoshimoto T. Expanding Diversity in Molecular Structures and Functions of the IL-6/IL-12 Heterodimeric Cytokine Family. *Front Immunol*. 2016; 7:479. Epub 2016/11/22. <https://doi.org/10.3389/fimmu.2016.00479> PMID: 27867385; PubMed Central PMCID: PMC5095122.
  22. Pflanz S, Timans JC, Cheung J, Rosales R, Kanzler H, Gilbert J, et al. IL-27, a heterodimeric cytokine composed of EBI3 and p28 protein, induces proliferation of naive CD4+ T cells. *Immunity*. 2002; 16(6):779–90. Epub 2002/07/18. [https://doi.org/10.1016/s1074-7613\(02\)00324-2](https://doi.org/10.1016/s1074-7613(02)00324-2) PMID: 12121660.
  23. Wojno ED, Hunter CA. New directions in the basic and translational biology of interleukin-27. *Trends Immunol*. 2012; 33(2):91–7. Epub 2011/12/20. <https://doi.org/10.1016/j.it.2011.11.003> [pii] PMID: 22177689; PubMed Central PMCID: PMC3273610.
  24. Pflanz S, Hibbert L, Mattson J, Rosales R, Vaisberg E, Bazan JF, et al. WSX-1 and glycoprotein 130 constitute a signal-transducing receptor for IL-27. *J Immunol*. 2004; 172(4):2225–31. Epub 2004/02/07. <https://doi.org/10.4049/jimmunol.172.4.2225> PMID: 14764690.
  25. Yoshimura T, Takeda A, Hamano S, Miyazaki Y, Kinjo I, Ishibashi T, et al. Two-sided roles of IL-27: induction of Th1 differentiation on naive CD4+ T cells versus suppression of proinflammatory cytokine production including IL-23-induced IL-17 on activated CD4+ T cells partially through STAT3-dependent mechanism. *J Immunol*. 2006; 177(8):5377–85. Epub 2006/10/04. <https://doi.org/10.4049/jimmunol.177.8.5377> PMID: 17015723.
  26. Yoshida H, Hunter CA. The immunobiology of interleukin-27. *Annu Rev Immunol*. 2015; 33:417–43. Epub 2015/04/12. <https://doi.org/10.1146/annurev-immunol-032414-112134> PMID: 25861977.

27. Laverdure S, Wang Z, Yang J, Yamamoto T, Thomas T, Sato T, et al. Interleukin-27 promotes autophagy in human serum-induced primary macrophages via an mTOR- and LC3-independent pathway. *Sci Rep*. 2021; 11(1):14898. Epub 2021/07/23. <https://doi.org/10.1038/s41598-021-94061-3> PMID: 34290273; PubMed Central PMCID: PMC8295388.
28. Hu X, Goswami S, Qiu J, Chen Q, Laverdure S, Sherman BT, et al. Profiles of Long Non-Coding RNAs and mRNA Expression in Human Macrophages Regulated by Interleukin-27. *Int J Mol Sci*. 2019; 20(24). Epub 20191209. <https://doi.org/10.3390/ijms20246207> PMID: 31835347; PubMed Central PMCID: PMC6941108.
29. Swaminathan S, Hu X, Zheng X, Kriga Y, Shetty J, Zhao Y, et al. Interleukin-27 treated human macrophages induce the expression of novel microRNAs which may mediate anti-viral properties. *Biochem Biophys Res Commun*. 2013; 434(2):228–34. Epub 20130325. <https://doi.org/10.1016/j.bbrc.2013.03.046> PMID: 23535375; PubMed Central PMCID: PMC3700531.
30. Imamichi T, Goswami S, Hu X, Laverdure S, Yang J, Qiu J, et al. MicroRNA Profiles in Monocyte-Derived Macrophages Generated by Interleukin-27 and Human Serum: Identification of a Novel HIV-Inhibiting and Autophagy-Inducing MicroRNA. *Int J Mol Sci*. 2021; 22(3). Epub 2021/02/03. <https://doi.org/10.3390/ijms22031290> PMID: 33525571; PubMed Central PMCID: PMC7865382.
31. Pot C, Apetoh L, Awasthi A, Kuchroo VK. Induction of regulatory T<sub>H</sub>1 cells and inhibition of T(H)17 cells by IL-27. *Semin Immunol*. 2011; 23(6):438–45. Epub 2011/09/07. <https://doi.org/10.1016/j.smim.2011.08.003> S1044-5323(11)00068-6 [pii]. PMID: 21893418; PubMed Central PMCID: PMC3230686.
32. Awasthi A, Carrier Y, Peron JP, Bettelli E, Kamanaka M, Flavell RA, et al. A dominant function for interleukin 27 in generating interleukin 10-producing anti-inflammatory T cells. *Nat Immunol*. 2007; 8(12):1380–9. Epub 2007/11/13. <https://doi.org/10.1038/ni1541> PMID: 17994022.
33. Zeitvogel J, Dalpke A, Eiz-Vesper B, Kracht M, Dittrich-Breiholz O, Werfel T, et al. Human primary keratinocytes show restricted ability to up-regulate suppressor of cytokine signaling (SOCS)3 protein compared with autologous macrophages. *J Biol Chem*. 2012; 287(13):9923–30. Epub 2012/02/02. <https://doi.org/10.1074/jbc.M111.280370> PMID: 22294695; PubMed Central PMCID: PMC3323061.
34. Yang B, Suwanpradit J, Sanchez-Lagunes R, Choi HW, Hoang P, Wang D, et al. IL-27 Facilitates Skin Wound Healing through Induction of Epidermal Proliferation and Host Defense. *J Invest Dermatol*. 2017; 137(5):1166–75. Epub 2017/01/31. <https://doi.org/10.1016/j.jid.2017.01.010> PMID: 28132857; PubMed Central PMCID: PMC5552041.
35. Aioi A, Imamichi T. IL-27 regulates cytokine production as a double-edged sword in keratinocytes. *Trends in Immunotherapy* 2022; 6(1):23–31. <https://doi.org/10.24294/ti.v6.i1.1436>
36. Nortey AN, Garces KN, Hackam AS. Exploring the role of interleukin-27 as a regulator of neuronal survival in central nervous system diseases. *Neural Regen Res*. 2022; 17(10):2149–52. Epub 2022/03/10. <https://doi.org/10.4103/1673-5374.336134> PMID: 35259821; PubMed Central PMCID: PMC9083161.
37. Sonobe Y, Yawata I, Kawanokuchi J, Takeuchi H, Mizuno T, Suzumura A. Production of IL-27 and other IL-12 family cytokines by microglia and their subpopulations. *Brain Research*. 2005; 1040(1):202–7. <https://doi.org/10.1016/j.brainres.2005.01.100> PMID: 15804443
38. Mirlekar B, Pylayeva-Gupta Y. IL-12 Family Cytokines in Cancer and Immunotherapy. *Cancers (Basel)*. 2021; 13(2). Epub 2021/01/10. <https://doi.org/10.3390/cancers13020167> PMID: 33418929; PubMed Central PMCID: PMC7825035.
39. Kourko O, Seaver K, Odoardi N, Basta S, Gee K. IL-27, IL-30, and IL-35: A Cytokine Triumvirate in Cancer. *Front Oncol*. 2019; 9:969. Epub 2019/11/05. <https://doi.org/10.3389/fonc.2019.00969> PMID: 31681561; PubMed Central PMCID: PMC6797860.
40. Brice DP, Murray GI, Wilson HM, Porter RJ, Berry S, Durum SK, et al. Interleukin-27 Regulates the Function of the Gastrointestinal Epithelial Barrier in a Human Tissue-Derived Organoid Model. *Biology (Basel)*. 2022; 11(3). Epub 2022/03/27. <https://doi.org/10.3390/biology11030427> PMID: 35336801; PubMed Central PMCID: PMC8945023.
41. McLean MH, Andrews C, Hanson ML, Baseler WA, Anver MR, Senkevitch E, et al. Interleukin-27 Is a Potential Rescue Therapy for Acute Severe Colitis Through Interleukin-10-Dependent, T-Cell-Independent Attenuation of Colonic Mucosal Innate Immune Responses. *Inflamm Bowel Dis*. 2017; 23(11):1983–95. Epub 2017/10/12. <https://doi.org/10.1097/MIB.0000000000001274> PMID: 29019857; PubMed Central PMCID: PMC5796760.
42. Swaminathan S, Dai L, Lane HC, Imamichi T. Evaluating the potential of IL-27 as a novel therapeutic agent in HIV-1 infection. *Cytokine Growth Factor Rev*. 2013; 24(6):571–7. Epub 20130817. <https://doi.org/10.1016/j.cytogfr.2013.07.001> PMID: 23962745; PubMed Central PMCID: PMC3851681.
43. Amsden H, Kourko O, Roth M, Gee K. Antiviral Activities of Interleukin-27: A Partner for Interferons? *Front Immunol*. 2022; 13:902853. Epub 20220510. <https://doi.org/10.3389/fimmu.2022.902853> PMID: 35634328; PubMed Central PMCID: PMC9134790.



44. Dai L, Lidie KB, Chen Q, Adelsberger JW, Zheng X, Huang D, et al. IL-27 inhibits HIV-1 infection in human macrophages by down-regulating host factor SPTBN1 during monocyte to macrophage differentiation. *J Exp Med*. 2013; 210(3):517–34. Epub 20130304. <https://doi.org/10.1084/jem.20120572> PMID: 23460728; PubMed Central PMCID: PMC3600911.
45. Poudyal D, Yang J, Chen Q, Goswami S, Adelsberger JW, Das S, et al. IL-27 posttranslationally regulates Y-box binding protein-1 to inhibit HIV-1 replication in human CD4+ T cells. *Aids*. 2019; 33(12):1819–30. Epub 2019/07/06. <https://doi.org/10.1097/QAD.0000000000002288> PMID: 31274540; PubMed Central PMCID: PMC6731144.
46. Yin Q, Zheng M, Luo Q, Jiang D, Zhang H, Chen C. YB-1 as an Oncoprotein: Functions, Regulation, Post-Translational Modifications, and Targeted Therapy. *Cells*. 2022; 11(7). Epub 20220404. <https://doi.org/10.3390/cells11071217> PMID: 35406781; PubMed Central PMCID: PMC8997642.
47. Alemasova EE, Pestryakov PE, Sukhanova MV, Kretov DA, Moor NA, Curmi PA, et al. Poly(ADP-ribosylation) as a new posttranslational modification of YB-1. *Biochimie*. 2015; 119:36–44. Epub 20151009. <https://doi.org/10.1016/j.biochi.2015.10.008> PMID: 26453809.
48. Jung JY, Roberts LL, Robinson CM. The presence of interleukin-27 during monocyte-derived dendritic cell differentiation promotes improved antigen processing and stimulation of T cells. *Immunology*. 2015; 144(4):649–60. <https://doi.org/10.1111/imm.12417> PMID: 25346485; PubMed Central PMCID: PMC4368171.
49. Imamichi T, Bernbaum JG, Laverdure S, Yang J, Chen Q, Highbarger H, et al. Natural Occurring Polymorphisms in HIV-1 Integrase and RNase H Regulate Viral Release and Autoprocessing. *J Virol*. 2021; 95(23):e0132321. Epub 2021/09/16. <https://doi.org/10.1128/JVI.01323-21> PMID: 34523971; PubMed Central PMCID: PMC8577372.
50. Theodore TS, Englund G, Buckler-White A, Buckler CE, Martin MA, Peden KW. Construction and characterization of a stable full-length macrophage-tropic HIV type 1 molecular clone that directs the production of high titers of progeny virions. *AIDS Res Hum Retroviruses*. 1996; 12(3):191–4. Epub 1996/02/10. <https://doi.org/10.1089/aid.1996.12.191> PMID: 8835195.
51. Adachi A, Gendelman HE, Koenig S, Folks T, Willey R, Rabson A, et al. Production of acquired immunodeficiency syndrome-associated retrovirus in human and nonhuman cells transfected with an infectious molecular clone. *J Virol*. 1986; 59(2):284–91. Epub 1986/08/01. <https://doi.org/10.1128/JVI.59.2.284-291.1986> PMID: 3016298; PubMed Central PMCID: PMC253077.
52. Connor RI, Chen BK, Choe S, Landau NR. Vpr is required for efficient replication of human immunodeficiency virus type-1 in mononuclear phagocytes. *Virology*. 1995; 206(2):935–44. Epub 1995/02/01. <https://doi.org/10.1006/viro.1995.1016> PMID: 7531918.
53. He J, Choe S, Walker R, Di Marzio P, Morgan DO, Landau NR. Human immunodeficiency virus type 1 viral protein R (Vpr) arrests cells in the G2 phase of the cell cycle by inhibiting p34cdc2 activity. *J Virol*. 1995; 69(11):6705–11. Epub 1995/11/01. <https://doi.org/10.1128/JVI.69.11.6705-6711.1995> PMID: 7474080; PubMed Central PMCID: PMC189580.
54. Cavrois M, Neidleman J, Greene WC. HIV-1 Fusion Assay. *Bio Protoc*. 2014; 4(16). Epub 2014/08/20. <https://doi.org/10.21769/bioprotoc.1212> PMID: 27525294; PubMed Central PMCID: PMC4982656.
55. Cavrois M, De Noronha C, Greene WC. A sensitive and specific enzyme-based assay detecting HIV-1 virion fusion in primary T lymphocytes. *Nat Biotechnol*. 2002; 20(11):1151–4. Epub 2002/10/02. <https://doi.org/10.1038/nbt745> PMID: 12355096.
56. Imamichi T, Chen Q, Hao M, Chang W, Yang J. The C-Terminal Domain of RNase H and the C-Terminus Amino Acid Residue Regulate Virus Release and Autoprocessing of a Defective HIV-1 Possessing M50I and V151I Changes in Integrase. *Viruses*. 2022; 14(12):2687. <https://doi.org/10.3390/v14122687> PMID: 36560691
57. Zhang YM, Imamichi H, Imamichi T, Lane HC, Falloon J, Vasudevachari MB, et al. Drug resistance during indinavir therapy is caused by mutations in the protease gene and in its Gag substrate cleavage sites. *J Virol*. 1997; 71(9):6662–70. Epub 1997/09/01. <https://doi.org/10.1128/JVI.71.9.6662-6670.1997> PMID: 9261388; PubMed Central PMCID: PMC191944.
58. McClure MO, Moore JP, Blanc DF, Scotting P, Cook GM, Keynes RJ, et al. Investigations into the mechanism by which sulfated polysaccharides inhibit HIV infection in vitro. *AIDS Res Hum Retroviruses*. 1992; 8(1):19–26. Epub 1992/01/01. <https://doi.org/10.1089/aid.1992.8.19> PMID: 1346567.
59. Brann TW, Dewar RL, Jiang MK, Shah A, Nagashima K, Metcalf JA, et al. Functional correlation between a novel amino acid insertion at codon 19 in the protease of human immunodeficiency virus type 1 and polymorphism in the p1/p6 Gag cleavage site in drug resistance and replication fitness. *J Virol*. 2006; 80(12):6136–45. Epub 2006/05/30. <https://doi.org/10.1128/JVI.02212-05> PMID: 16731952; PubMed Central PMCID: PMC1472590.
60. Sui H, Chen Q, Yang J, Srirattanapirom S, Imamichi T. Manganese enhances DNA- or RNA-mediated innate immune response by inducing phosphorylation of TANK-binding kinase 1. *iScience*. 2022; 25

- (11):105352. Epub 20221013. <https://doi.org/10.1016/j.isci.2022.105352> PMID: 36325059; PubMed Central PMCID: PMC9619380.
61. Sui H, Zhou M, Imamichi H, Jiao X, Sherman BT, Lane HC, et al. STING is an essential mediator of the Ku70-mediated production of IFN- $\lambda$ 1 in response to exogenous DNA. *Sci Signal*. 2017; 10(488). Epub 20170718. <https://doi.org/10.1126/scisignal.aah5054> PMID: 28720717.
  62. Sharova N, Swingle C, Sharkey M, Stevenson M. Macrophages archive HIV-1 virions for dissemination in trans. *EMBO J*. 2005; 24(13):2481–9. Epub 2005/05/28. <https://doi.org/10.1038/sj.emboj.7600707> PMID: 15920469; PubMed Central PMCID: PMC1173148.
  63. Butler SL, Hansen MS, Bushman FD. A quantitative assay for HIV DNA integration in vivo. *Nat Med*. 2001; 7(5):631–4. Epub 2001/05/01. <https://doi.org/10.1038/87979> PMID: 11329067.
  64. Piekna-Przybylska D, Dykes C, Demeter LM, Bambara RA. Sequences in the U3 region of human immunodeficiency virus 1 improve efficiency of minus strand transfer in infected cells. *Virology*. 2011; 410(2):368–74. Epub 2011/01/05. <https://doi.org/10.1016/j.virol.2010.11.026> PMID: 21193211; PubMed Central PMCID: PMC3071581.
  65. Zhou Y, Zhou B, Pache L, Chang M, Khodabakhshi AH, Tanaseichuk O, et al. Metascape provides a biologist-oriented resource for the analysis of systems-level datasets. *Nat Commun*. 2019; 10(1):1523. Epub 20190403. <https://doi.org/10.1038/s41467-019-09234-6> PMID: 30944313; PubMed Central PMCID: PMC6447622.
  66. Troegeler A, Lastrucci C, Duval C, Tanne A, Cougoule C, Maridonneau-Parini I, et al. An efficient siRNA-mediated gene silencing in primary human monocytes, dendritic cells and macrophages. *Immunol Cell Biol*. 2014; 92(8):699–708. Epub 2014/06/04. <https://doi.org/10.1038/icb.2014.39> PMID: 24890643.
  67. Imamichi T, Berg SC, Imamichi H, Lopez JC, Metcalf JA, Falloon J, et al. Relative replication fitness of a high-level 3'-azido-3'-deoxythymidine-resistant variant of human immunodeficiency virus type 1 possessing an amino acid deletion at codon 67 and a novel substitution (Thr→Gly) at codon 69. *J Virol*. 2000; 74(23):10958–64. <https://doi.org/10.1128/jvi.74.23.10958-10964.2000> PMID: 11069990; PubMed Central PMCID: PMC113175.
  68. Kirchhoff F. Immune Evasion and Counteraction of Restriction Factors by HIV-1 and Other Primate Lentiviruses. *Cell Host & Microbe*. 2010; 8(1):55–67. <https://doi.org/10.1016/j.chom.2010.06.004> PMID: 20638642
  69. Kluge SF, Sauter D, Kirchhoff F. SnapShot: Antiviral Restriction Factors. *Cell*. 2015; 163(3):774–e1. <https://doi.org/10.1016/j.cell.2015.10.019> PMID: 26496613
  70. Sowrirajan B, Saito Y, Poudyal D, Chen Q, Sui H, DeRavin SS, et al. Interleukin-27 Enhances the Potential of Reactive Oxygen Species Generation from Monocyte-derived Macrophages and Dendritic cells by Induction of p47(phox). *Sci Rep*. 2017; 7:43441. Epub 2017/02/28. <https://doi.org/10.1038/srep43441> PMID: 28240310; PubMed Central PMCID: PMC5327488.
  71. Brass AL, Dykxhoorn DM, Benita Y, Yan N, Engelman A, Xavier RJ, et al. Identification of host proteins required for HIV infection through a functional genomic screen. *Science*. 2008; 319(5865):921–6. Epub 20080110. <https://doi.org/10.1126/science.1152725> PMID: 18187620.
  72. König R, Zhou Y, Elleder D, Diamond TL, Bonamy GM, Irelan JT, et al. Global analysis of host-pathogen interactions that regulate early-stage HIV-1 replication. *Cell*. 2008; 135(1):49–60. <https://doi.org/10.1016/j.cell.2008.07.032> PMID: 18854154; PubMed Central PMCID: PMC2628946.
  73. Smith AJ, Li Q, Wietgreffe SW, Schacker TW, Reilly CS, Haase AT. Host genes associated with HIV-1 replication in lymphatic tissue. *J Immunol*. 2010; 185(9):5417–24. Epub 20101008. <https://doi.org/10.4049/jimmunol.1002197> PMID: 20935203; PubMed Central PMCID: PMC2959144.
  74. Yeung ML, Houzet L, Yedavalli VS, Jeang KT. A genome-wide short hairpin RNA screening of jurkat T-cells for human proteins contributing to productive HIV-1 replication. *J Biol Chem*. 2009; 284(29):19463–73. Epub 20090520. <https://doi.org/10.1074/jbc.M109.010033> PMID: 19460752; PubMed Central PMCID: PMC2740572.
  75. Zhou H, Xu M, Huang Q, Gates AT, Zhang XD, Castle JC, et al. Genome-scale RNAi screen for host factors required for HIV replication. *Cell Host Microbe*. 2008; 4(5):495–504. Epub 20081030. <https://doi.org/10.1016/j.chom.2008.10.004> PMID: 18976975.
  76. Taylor JP, Cash MN, Santostefano KE, Nakanishi M, Terada N, Wallet MA. CRISPR/Cas9 knockout of USP18 enhances type I IFN responsiveness and restricts HIV-1 infection in macrophages. *J Leukoc Biol*. 2018; 103(6):1225–40. Epub 20180213. <https://doi.org/10.1002/JLB.3MIA0917-352R> PMID: 29437254; PubMed Central PMCID: PMC6754309.
  77. Park RJ, Wang T, Koundakjian D, Hultquist JF, Lamothe-Molina P, Monel B, et al. A genome-wide CRISPR screen identifies a restricted set of HIV host dependency factors. *Nat Genet*. 2017; 49(2):193–203. Epub 20161219. <https://doi.org/10.1038/ng.3741> PMID: 27992415; PubMed Central PMCID: PMC5511375.

78. Huang H, Kong W, Jean M, Fiches G, Zhou D, Hayashi T, et al. A CRISPR/Cas9 screen identifies the histone demethylase MINA53 as a novel HIV-1 latency-promoting gene (LPG). *Nucleic Acids Res.* 2019; 47(14):7333–47. <https://doi.org/10.1093/nar/gkz493> PMID: 31165872; PubMed Central PMCID: PMC6698651.
79. Krasnopolsky S, Kuzmina A, Taube R. Genome-wide CRISPR knockout screen identifies ZNF304 as a silencer of HIV transcription that promotes viral latency. *PLoS Pathog.* 2020; 16(9):e1008834. Epub 20200921. <https://doi.org/10.1371/journal.ppat.1008834> PMID: 32956422; PubMed Central PMCID: PMC7529202.
80. Li Z, Hajian C, Greene WC. Identification of unrecognized host factors promoting HIV-1 latency. *PLoS Pathog.* 2020; 16(12):e1009055. Epub 20201203. <https://doi.org/10.1371/journal.ppat.1009055> PMID: 33270809; PubMed Central PMCID: PMC7714144.
81. Li Z, Wu J, Chavez L, Hoh R, Deeks SG, Pillai SK, et al. Reiterative Enrichment and Authentication of CRISPRi Targets (REACT) identifies the proteasome as a key contributor to HIV-1 latency. *PLoS Pathog.* 2019; 15(1):e1007498. Epub 20190115. <https://doi.org/10.1371/journal.ppat.1007498> PMID: 30645648; PubMed Central PMCID: PMC6333332.
82. OhAinle M, Helms L, Vermeire J, Roesch F, Humes D, Basom R, et al. A virus-packageable CRISPR screen identifies host factors mediating interferon inhibition of HIV. *Elife.* 2018;7. Epub 20181206. <https://doi.org/10.7554/eLife.39823> PMID: 30520725; PubMed Central PMCID: PMC6286125.
83. Ohainle M, Kim K, Komurlu Keceli S, Felton A, Campbell E, Luban J, et al. TRIM34 restricts HIV-1 and SIV capsids in a TRIM5 $\alpha$ -dependent manner. *PLoS Pathog.* 2020; 16(4):e1008507. Epub 20200413. <https://doi.org/10.1371/journal.ppat.1008507> PMID: 32282853; PubMed Central PMCID: PMC7179944.
84. Hiatt J, Hultquist JF, McGregor MJ, Bouhaddou M, Leenay RT, Simons LM, et al. A functional map of HIV-host interactions in primary human T cells. *Nat Commun.* 2022; 13(1):1752. Epub 20220401. <https://doi.org/10.1038/s41467-022-29346-w> PMID: 35365639; PubMed Central PMCID: PMC8976027.
85. Hultquist JF, Schumann K, Woo JM, Manganaro L, McGregor MJ, Doudna J, et al. A Cas9 Ribonucleoprotein Platform for Functional Genetic Studies of HIV-Host Interactions in Primary Human T Cells. *Cell Rep.* 2016; 17(5):1438–52. <https://doi.org/10.1016/j.celrep.2016.09.080> PMID: 27783955; PubMed Central PMCID: PMC5123761.
86. Kane M, Zang TM, Rihn SJ, Zhang F, Kueck T, Alim M, et al. Identification of Interferon-Stimulated Genes with Antiretroviral Activity. *Cell Host Microbe.* 2016; 20(3):392–405. <https://doi.org/10.1016/j.chom.2016.08.005> PMID: 27631702; PubMed Central PMCID: PMC5026698.
87. Li C, Burdick RC, Nagashima K, Hu WS, Pathak VK. HIV-1 cores retain their integrity until minutes before uncoating in the nucleus. *Proc Natl Acad Sci U S A.* 2021;118(10). <https://doi.org/10.1073/pnas.2019467118> PMID: 33649225; PubMed Central PMCID: PMC7958386.
88. Burdick RC, Li C, Munshi M, Rawson JMO, Nagashima K, Hu WS, et al. HIV-1 uncoats in the nucleus near sites of integration. *Proc Natl Acad Sci U S A.* 2020; 117(10):5486–93. Epub 20200224. <https://doi.org/10.1073/pnas.1920631117> PMID: 32094182; PubMed Central PMCID: PMC7071919.
89. Braun E, Hotter D, Koepke L, Zech F, Groß R, Sparrer KMJ, et al. Guanylate-Binding Proteins 2 and 5 Exert Broad Antiviral Activity by Inhibiting Furin-Mediated Processing of Viral Envelope Proteins. *Cell Reports.* 2019; 27(7):2092–104.e10. <https://doi.org/10.1016/j.celrep.2019.04.063> PMID: 31091448
90. Krapp C, Hotter D, Gawanbacht A, McLaren Paul J, Kluge Silvia F, Stürzel Christina M, et al. Guanylate Binding Protein (GBP) 5 Is an Interferon-Inducible Inhibitor of HIV-1 Infectivity. *Cell Host & Microbe.* 2016; 19(4):504–14. <https://doi.org/10.1016/j.chom.2016.02.019>.
91. Ishida Y, Kakuni M, Bang BR, Sugahara G, Lau DT, Tateno-Mukaidani C, et al. Hepatic IFN-Induced Protein with Tetratricopeptide Repeats Regulation of HCV Infection. *J Interferon Cytokine Res.* 2019; 39(3):133–46. <https://doi.org/10.1089/jir.2018.0103> PMID: 30844328; PubMed Central PMCID: PMC6441290.
92. Kubo Y, Yasui K, Izumida M, Hayashi H, Matsuyama T. IDO1, FAT10, IFI6, and GILT Are Involved in the Antiretroviral Activity of  $\gamma$ -Interferon and IDO1 Restricts Retrovirus Infection by Autophagy Enhancement. *Cells.* 2022; 11(14). Epub 20220719. <https://doi.org/10.3390/cells11142240> PMID: 35883685; PubMed Central PMCID: PMC9323257.
93. Schoggins JW, Wilson SJ, Panis M, Murphy MY, Jones CT, Bieniasz P, et al. A diverse range of gene products are effectors of the type I interferon antiviral response. *Nature.* 2011; 472(7344):481–5. Epub 20110410. <https://doi.org/10.1038/nature09907> PMID: 21478870; PubMed Central PMCID: PMC3409588.
94. Kzhyshkowska J, Gratchev A, Goerdts S. Stabilin-1, a homeostatic scavenger receptor with multiple functions. *J Cell Mol Med.* 2006; 10(3):635–49. <https://doi.org/10.1111/j.1582-4934.2006.tb00425.x> PMID: 16989725; PubMed Central PMCID: PMC3933147.

95. Kzhyshkowska J. Multifunctional Receptor Stabilin-1 in Homeostasis and Disease. *TheScientific-WorldJOURNAL*. 2010; 10:759265. <https://doi.org/10.1100/tsw.2010.189> PMID: 20953554
96. Rantakari P, Patten DA, Valtonen J, Karikoski M, Gerke H, Dawes H, et al. Stabilin-1 expression defines a subset of macrophages that mediate tissue homeostasis and prevent fibrosis in chronic liver injury. *Proc Natl Acad Sci U S A*. 2016; 113(33):9298–303. Epub 20160729. <https://doi.org/10.1073/pnas.1604780113> PMID: 27474165; PubMed Central PMCID: PMC4995933.
97. Cunha SR, Mohler PJ. Ankyrin protein networks in membrane formation and stabilization. *J Cell Mol Med*. 2009; 13(11–12):4364–76. Epub 20091016. <https://doi.org/10.1111/j.1582-4934.2009.00943.x> PMID: 19840192; PubMed Central PMCID: PMC4515052.
98. Mosavi LK, Cammett TJ, Desrosiers DC, Peng ZY. The ankyrin repeat as molecular architecture for protein recognition. *Protein Sci*. 2004; 13(6):1435–48. <https://doi.org/10.1110/ps.03554604> PMID: 15152081; PubMed Central PMCID: PMC2279977.
99. Sedgwick SG, Smerdon SJ. The ankyrin repeat: a diversity of interactions on a common structural framework. *Trends Biochem Sci*. 1999; 24(8):311–6. [https://doi.org/10.1016/s0968-0004\(99\)01426-7](https://doi.org/10.1016/s0968-0004(99)01426-7) PMID: 10431175.
100. Bennett V, Baines AJ. Spectrin and ankyrin-based pathways: metazoan inventions for integrating cells into tissues. *Physiol Rev*. 2001; 81(3):1353–92. <https://doi.org/10.1152/physrev.2001.81.3.1353> PMID: 11427698.
101. Walser M, Mayor J, Rothenberger S. Designed Ankyrin Repeat Proteins: A New Class of Viral Entry Inhibitors. *Viruses*. 2022; 14(10). Epub 20221012. <https://doi.org/10.3390/v14102242> PMID: 36298797; PubMed Central PMCID: PMC9611651.
102. Sharma V, Bryant C, Montero M, Creegan M, Slike B, Krebs SJ, et al. Monocyte and CD4+ T-cell anti-viral and innate responses associated with HIV-1 inflammation and cognitive impairment. *Aids*. 2020; 34(9):1289–301. <https://doi.org/10.1097/QAD.0000000000002537> PMID: 32598115.
103. Jackson AL, Linsley PS. Noise amidst the silence: off-target effects of siRNAs? *Trends Genet*. 2004; 20(11):521–4. <https://doi.org/10.1016/j.tig.2004.08.006> PMID: 15475108.
104. Jackson AL, Linsley PS. Recognizing and avoiding siRNA off-target effects for target identification and therapeutic application. *Nat Rev Drug Discov*. 2010; 9(1):57–67. <https://doi.org/10.1038/nrd3010> PMID: 20043028.
105. Sui H, Zhou M, Chen Q, Lane HC, Imamichi T. siRNA enhances DNA-mediated interferon lambda-1 response through crosstalk between RIG-I and IFI16 signalling pathway. *Nucleic Acids Res*. 2014; 42(1):583–98. Epub 20130918. <https://doi.org/10.1093/nar/gkt844> PMID: 24049081; PubMed Central PMCID: PMC3874163.
106. Reynolds A, Anderson EM, Vermeulen A, Fedorov Y, Robinson K, Leake D, et al. Induction of the interferon response by siRNA is cell type- and duplex length-dependent. *Rna*. 2006; 12(6):988–93. Epub 20060412. <https://doi.org/10.1261/ma.2340906> PMID: 16611941; PubMed Central PMCID: PMC1464853.
107. Law RH, Zhang Q, McGowan S, Buckle AM, Silverman GA, Wong W, et al. An overview of the serpin superfamily. *Genome Biol*. 2006; 7(5):216. Epub 20060530. <https://doi.org/10.1186/gb-2006-7-5-216> PMID: 16737556; PubMed Central PMCID: PMC1779521.
108. Veronez CL, Csuka D, Sheikh FR, Zuraw BL, Farkas H, Bork K. The Expanding Spectrum of Mutations in Hereditary Angioedema. *The Journal of Allergy and Clinical Immunology: In Practice*. 2021; 9(6):2229–34. <https://doi.org/10.1016/j.jaip.2021.03.008> PMID: 33746090
109. Heda GD, Kehoe KJ, Mahdi F, Schmaier AH. Phosphatase 2A participates in interferon-gamma's induced upregulation of C1 inhibitor mRNA expression. *Blood*. 1996; 87(7):2831–8. PMID: 8639901.
110. Kirou KA, Lee C, George S, Louca K, Papagiannis IG, Peterson MG, et al. Coordinate overexpression of interferon-alpha-induced genes in systemic lupus erythematosus. *Arthritis Rheum*. 2004; 50(12):3958–67. <https://doi.org/10.1002/art.20798> PMID: 15593221.
111. Scarlatti G, Tresoldi E, Björndal A, Fredriksson R, Colognesi C, Deng HK, et al. In vivo evolution of HIV-1 co-receptor usage and sensitivity to chemokine-mediated suppression. *Nat Med*. 1997; 3(11):1259–65. <https://doi.org/10.1038/nm1197-1259> PMID: 9359702.
112. Cicardi M, Zingale L, Zanichelli A, Pappalardo E, Cicardi B. C1 inhibitor: molecular and clinical aspects. *Springer Semin Immunopathol*. 2005; 27(3):286–98. Epub 20051111. <https://doi.org/10.1007/s00281-005-0001-4> PMID: 16267649.
113. Ponard D, Gaboriaud C, Charignon D, Ghannam A, Wagenaar-Bos IGA, Roem D, et al. SERPING1 mutation update: Mutation spectrum and C1 Inhibitor phenotypes. *Hum Mutat*. 2020; 41(1):38–57. Epub 20191022. <https://doi.org/10.1002/humu.23917> PMID: 31517426.

114. Pappalardo E, Zingale LC, Terlizzi A, Zanichelli A, Folcioni A, Cicardi M. Mechanisms of C1-inhibitor deficiency. *Immunobiology*. 2002; 205(4–5):542–51. <https://doi.org/10.1078/0171-2985-00153> PMID: [12396014](#).
115. Walford HH, Zuraw BL. Current update on cellular and molecular mechanisms of hereditary angioedema. *Ann Allergy Asthma Immunol*. 2014; 112(5):413–8. Epub 20140129. <https://doi.org/10.1016/j.anai.2013.12.023> PMID: [24484972](#).
116. Thomson TM, Toscano-Guerra E, Casis E, Paciucci R. C1 esterase inhibitor and the contact system in COVID-19. *Br J Haematol*. 2020; 190(4):520–4. Epub 20200728. <https://doi.org/10.1111/bjh.16938> PMID: [32531085](#); PubMed Central PMCID: PMC7323335.
